1

2 **Acute decrease in plasma membrane tension induces macropinocytosis**

3 ***via* PLD2 activation**

4

5 Julie Loh<sup>1</sup>, Jophin Joseph<sup>2</sup>, Mei-Chun Chuang<sup>1</sup>, Shan-Shan Lin<sup>1</sup>, Yu-Chen

6 Chang<sup>1</sup>, You-An Su<sup>1</sup>, Allen P. Liu<sup>2</sup> and Ya-Wen Liu<sup>1,3</sup>

7

8 <sup>1</sup>Institute of Molecular Medicine, College of Medicine, National Taiwan

9 University, Taipei, 10002, Taiwan.

10 <sup>2</sup>Department of Mechanical Engineering, University of Michigan, Ann Arbor, MI

11 48109, USA.

12 <sup>3</sup>Center of Precision Medicine, College of Medicine, National Taiwan

13 University, Taipei, 10002, Taiwan.

14 Correspondence to: Ya-Wen Liu, [yawenliu@ntu.edu.tw](mailto:yawenliu@ntu.edu.tw)

15

16

17 Key words: lipid rafts, phosphatidic acid, mechanical transduction, endocytosis

18 Running title: Membrane flaccidity induces macropinocytosis

## 1 **Summary**

2 We reveal a mechanical induction of macropinocytosis that is elicited by  
3 acute decrease of plasma membrane tension, followed by lipid raft  
4 destabilization, PLD2 activation and PA production.

5

## 6 **Abstract**

7 Internalization of macromolecules and membrane into cells through  
8 endocytosis is critical for cellular growth, signaling, and membrane tension  
9 homeostasis. Although endocytosis is responsive to both biochemical and  
10 physical stimuli, how physical cues modulate endocytic pathways is less  
11 understood. In contrary to the accumulating discoveries on effects of increased  
12 membrane tension on endocytosis, little is known about how a drop of tension  
13 impacts membrane trafficking. Here we reveal that acute reduction of plasma  
14 membrane tension results in phosphatidic acid, F-actin and dynamin 2-enriched  
15 dorsal membrane ruffling and subsequent macropinocytosis in myoblast. The  
16 membrane flaccidity-induced local phosphatidic acid production depends on  
17 phospholipase D2 (PLD2) that is activated *via* lipid raft disruption. Furthermore,  
18 the “membrane flaccidity-PLD2-macropinocytosis” pathway is dominant in  
19 myotube, reflecting a potential mechanism of membrane tension homeostasis  
20 upon intensive muscle stretching and relaxation. Together, we identify a new  
21 mechanotransduction pathway which converts acute tension drop into PA  
22 production and subsequently initiates macropinocytosis *via* actin and dynamin  
23 activities.

24

## 25 **Introduction**

26 Eukaryotic cells harness multiple endocytic pathways to internalize fluid and

1 membrane into transport vesicles from the plasma membrane (Conner and  
2 Schmid, 2003; Doherty and McMahon, 2009). In response to various cellular  
3 demands and environmental stimuli, endocytic machineries are regulated  
4 biochemically or physically to govern the growth and survival of cells (Dai and  
5 Sheetz, 1995; Liu et al., 2017; Scita and Di Fiore, 2010). Among them,  
6 macropinocytosis is an endocytic pathway that is induced by biochemical  
7 stimuli, including nutrients, growth factors, integrin substrates or even viruses  
8 and forms actin-based membrane ruffling and engulfment that leads to the  
9 formation of macropinosomes (Buckley and King, 2017; Doherty and McMahon,  
10 2009).

11 Upon hyper-stimulation of growth factor receptors, activated PI3K and small  
12 GTPases initiate macropinocytosis *via* phosphatidylinositol (3,4,5)-  
13 trisphosphate (PIP<sub>3</sub>) production and actin polymerization (Levin et al., 2015;  
14 Yoshida et al., 2018). After membrane ruffling and closure, a sealed and large  
15 endocytic vacuole (1-10  $\mu\text{m}$  in diameter) is formed. With the relatively large  
16 amount of solutes and membrane area being internalized, macropinocytosis is  
17 an efficient and ideal route to quickly uptake nutrients or attenuate cell signaling  
18 (Doherty and McMahon, 2009). Despite the clearly-defined, biochemically  
19 induced mechanism of macropinocytosis, little is known about the effects of  
20 mechanical alteration on macropinosome formation.

21 Membrane tension, the force applied on plasma membrane, has emerged as  
22 a master integrator which governs distinct cellular processes, including  
23 membrane trafficking, cell migration, immunological responses, cell growth and  
24 differentiation (Dai and Sheetz, 1995; Diz-Munoz et al., 2013; Masters et al.,  
25 2013). For endocytosis, cells need to overcome higher energetic barrier to bend  
26 the membrane inwardly when membrane tension is high, *e.g.* by using the

1 pulling force from actin polymerization in clathrin-mediated endocytosis.  
2 (Boulant et al., 2011; Tan et al., 2015; Weinberg and Drubin, 2012). Conversely,  
3 when tension is decreased, it is easier for endocytic machinery to deform the  
4 membrane thus endocytosis is increased (Saleem et al., 2015; Shi and  
5 Baumgart, 2015).

6 Plasma membrane tension is contributed by membrane-cytoskeleton  
7 adhesion and osmotic pressure (Gauthier et al., 2012). Although membrane  
8 tension is used to control multiple cellular events, cells also need to maintain  
9 the homeostasis of membrane tension by sensing the change of tension and  
10 modulating its membrane area or cytoskeletal attachment *via* endocytosis,  
11 exocytosis, membrane invagination, actin polymerization or depolymerization  
12 (Diz-Munoz et al., 2013; Gauthier et al., 2012; Nassoy and Lamaze, 2012).  
13 Together, a feedback regulation of membrane tension, actin polymerization and  
14 membrane trafficking underpins the tension homeostasis and membrane  
15 remodeling events in cells.

16 The sensors of membrane tension are generally transmembrane proteins or  
17 peripheral membrane proteins, including stretch-activated ion channels,  
18 caveolin-cavin complex, curvature sensing proteins or membrane-actin  
19 interacting proteins (Diz-Munoz et al., 2013; Tsujita et al., 2015). Recently,  
20 Petersen *et al.* reported that lipid raft could function as a mechanosensor that  
21 undergoes kinetic or mechanical disruption to activate phospholipase D2 (PLD2)  
22 (Petersen et al., 2016). PLD2 is a plasma membrane-localized lipase which  
23 catalyzes the conversion of phosphatidylcholine (PC) into phosphatidic acid (PA)  
24 and choline, and is involved in endocytosis and actin polymerization (Antonescu  
25 et al., 2010; Colley et al., 1997; Du et al., 2004; Jiang et al., 2016). PLD2 mainly  
26 localizes at a lipid microdomain, the lipid raft, on plasma membrane *via*

1 palmitoylation on its C223 and C224 residues where PC and phosphatidyl-4,5-  
2 bisphosphate (PI(4,5)P<sub>2</sub>), its substrate and activator, are excluded (Xie et al.,  
3 2002). Chemical or mechanical disruption of lipid raft may release the  
4 segregated PLD2 thus enhance the PA production at the plasma membrane  
5 (Diz-Munoz et al., 2016; Petersen et al., 2016).

6 PA is a negatively charged, cone-shaped lipid identified as a key mediator in  
7 phospholipid metabolism, mTOR activation, membrane trafficking,  
8 mitochondrial fusion and actin polymerization (Liu et al., 2013; Yang and  
9 Frohman, 2012). PA could be produced through phospholipid synthesis (the  
10 Kennedy pathway) in the endoplasmic reticulum, the phosphorylation of  
11 diacylglycerol by diacylglycerol kinase, or the hydrolysis of PC by PLD on  
12 plasma or endosomal membranes (Liu et al., 2013). Given the activity of PLD2  
13 regulated by mechanical cues as well as the importance of its enzymatic  
14 product, PA, on actin polymerization and membrane trafficking, we hypothesize  
15 that alteration of membrane tension may affect PLD2 activity thus impacts  
16 endocytosis. Here, we discover that an acute decrease of plasma membrane  
17 tension induces PA production which triggers macropinocytosis without eliciting  
18 an increase of PIP<sub>3</sub>.

19

## 20 **Results**

### 21 **Enrichment of PA at dorsal membrane ruffles upon tension drop**

22 To examine the direct effect of membrane tension on PLD activity, we utilized  
23 hypo- or hypertonic buffer to induce the increase or decrease of membrane  
24 tension respectively in mouse myoblasts, similar to the approach taken by  
25 numerous prior studies (Boulant et al., 2011; Diz-Munoz et al., 2013; Houk et  
26 al., 2012). After transfection of a PA biosensor (PABD-GFP, PA binding domain

1 of yeast Spo20p fused with GFP) into C2C12 myoblast, we imaged its  
2 distribution with inverted epi-fluorescence microscopy at 37 °C. Similar to a  
3 previous report (Zeniou-Meyer et al., 2007), PABD-GFP mainly distributed in  
4 nucleus and plasma membrane, especially at lamellipodia and membrane  
5 ruffles when cells were incubated in an isotonic buffer (1X PBS) (Fig. 1Aa).  
6 Interestingly, the enriched signals of PABD-GFP at plasma membrane became  
7 diffused after 2 min-incubation in a hypotonic buffer (0.5X PBS) (Fig. 1Ab), and  
8 it re-appeared when the cells were recovered by 1X PBS for 2 minutes (Fig.  
9 1Ac). We hereafter referred this hypotonic treatment followed with isotonic  
10 buffer recovery as osmotic shock (OS) treatment.

11 A similar phenotype could be observed by directly incubating the cells with a  
12 hypertonic buffer (PBS + 150 mM sucrose) where PABD-GFP signal at  
13 membrane ruffles increased from 2 min, peaked at 5 min and gradually settled  
14 (Fig. 1B and S1A). We thus quantified the effect of hypertonic buffer treatment  
15 on membrane ruffling by dividing the ruffling phenotype into four categories:  
16 sparse, mild, intermediate and severe with <5%, 5-10%, 10-25% or >25% of  
17 dorsal area equipped with membrane ruffles respectively (Fig. 1C). While only  
18 5% of cells incubated in isotonic buffer had vigorous membrane ruffles  
19 (intermediate and severe), 5-min hypertonic buffer incubation significantly  
20 increased this population to 52%. Together, we found that PABD-GFP signal at  
21 plasma membrane was enhanced when membrane tension was reduced by  
22 OS or hypertonic buffer treatment.

23 To test whether the enrichment of PABD-GFP at plasma membrane reflects  
24 a change of cellular PA level upon tension alteration, we extracted total lipids  
25 from cells treated with different buffers, measured the amount of PA with an  
26 enzymatic assay, normalized with protein concentrations and expressed it as

1 fold change compared with control cells. While the total PA amount in  
2 hypertonic buffer-treated cells showed similar kinetic accumulation with PABD-  
3 GFP signals which increased gradually and peaked at 5 min (Fig. 1D), all the  
4 tension manipulations (hypertonic, hypotonic and OS) led to increased total PA  
5 (Fig. S1B). These results suggest that total PA quantification may not reflect  
6 local PA production or distribution. To specifically investigate the effect of  
7 membrane tension on PA dynamics on plasma membrane, we thus mainly used  
8 PABD-GFP and live-cell imaging to further dissect this phenomenon.

9 To identify what the PA-rich membrane ruffles induced by tension drop are,  
10 we examined several plasma membrane components, including F-actin,  
11 dynamin-2 (Dyn2), phosphatidylinositol-4,5-bisphosphate (PLC-PH-GFP, a probe for  
12 PI(4,5)P<sub>2</sub>), clathrin-coated pit adaptor protein ( $\mu$ 2-GFP) and PIP<sub>3</sub> (labeled with  
13 Akt-PH-GFP) (Fig. 2A-F). In line with the function of PA on actin polymerization,  
14 we observed F-actin enrichment on the PABD-GFP ruffles where the membrane  
15 fission enzyme Dyn2 was also localized to (Fig. 2A, B). We thus used Dyn2-  
16 mCherry to mark the tension drop-induced membrane ruffles for other  
17 membrane components analysis between different pairs of markers.  
18 Interestingly, while PI(4,5)P<sub>2</sub> was enriched and co-localized with Dyn2-mCherry,  
19 neither PIP<sub>3</sub> nor  $\mu$ 2-GFP were enriched at those membrane ruffles (Fig. 2C-E).  
20 In addition to the enrichment of F-actin on membrane ruffles, dramatic  
21 accumulation of cortical actin and actin stress fibers also occurred upon  
22 hypertonic buffer treatment (Fig. 2F).

23 To further visualize the membrane ruffles in three dimension (3D) when cell  
24 encounters acute tension reduction, we utilized spinning disk confocal  
25 microscopy to image the cell before and after hypertonic buffer treatment along  
26 the z-axis. After image acquisition and 3D reconstruction, we found that PABD-

1 GFP and Dyn2-mCherry-enriched membrane ruffles were distributed at the  
2 peripheral dorsal membrane (open arrow heads in Fig. 2G, H). The decrease  
3 of cell volume upon hypertonic buffer incubation could be observed in the  
4 orthogonal image where there was a reduction in cell height without changing  
5 cell width (Fig. 2I, J). Notably, all the PA and Dyn2-enriched membrane ruffles  
6 existed only at the dorsal membrane. Together, we found that an acute  
7 decrease of plasma membrane tension results in F-actin and PA-enriched  
8 membrane ruffle formation at the peripheral dorsal membrane.

9

### 10 **An acute membrane tension drop induces macropinocytosis**

11 The membrane flaccidity-induced F-actin and Dyn2-rich dorsal membrane  
12 waves were reminiscent of the membrane ruffles in macropinocytosis. To  
13 examine this possibility, we added a macropinocytosis-specific cargo,  
14 rhodamine-conjugated dextran (Rh-Dextran) into buffers with different osmotic  
15 conditions and incubated PABD-GFP expressing cells with these buffers. While  
16 no dextran signal was detected in cells incubated with isotonic buffer, several  
17 red puncta with about 1  $\mu\text{m}$  in diameter were observed at the cell periphery in  
18 hypertonic and OS-treated cells together with prominent PABD-GFP ruffles (Fig.  
19 3A). Quantification results showed that both OS and hypertonic buffer  
20 treatments result in ~ 20% cells obtaining  $\geq 3$  dextran-positive macropinosomes  
21 (Fig. 3B). This result suggests that acute tension reduction induced by either  
22 direct hypertonic buffer incubation or OS treatment results in PA production,  
23 actin and Dyn2-rich membrane ruffling and subsequently macropinocytosis.

24

### 25 **PLD2 is responsible for PA production upon tension decrease**

26 To examine whether PLD2 is responsible for the tension induced-PA



1 production, we first used a general PLD inhibitor 1-butanol (Brown et al., 2007),  
2 to pre-treat myoblasts for 10 min and then incubated the cells with hypertonic  
3 buffer (Fig. S2). After 10 min incubation with 0.1% 1-butanol in isotonic buffer,  
4 mild cell contraction and diminished PABD-GFP signal on plasma membrane  
5 were observed (Fig. S2A). Further contraction of the cell was observed after  
6 hypertonic buffer treatment, yet no membrane ruffles were induced. By contrast,  
7 the control alcohol 2-butanol-treated cells showed prominent membrane ruffling  
8 enriched with PABD-GFP and Dyn2-mCherry upon tension drop. (Fig. S2B).  
9 This result indicates that PLD activity is essential for the PA-rich membrane  
10 ruffles induced by tension drop.

11 Mammalian cells express mainly two isoforms of PLD, PLD1 and PLD2,  
12 which are localized to intracellular membrane and plasma membrane,  
13 respectively. To examine the involvement of these two PLDs, we first monitored  
14 the distribution of PLD1 and PLD2 in cells treated with hypertonic buffer. While  
15 GFP-PLD1 remained intracellularly distributed in hypertonic buffer, GFP-PLD2  
16 showed increased signals at dorsal membrane ruffles upon tension reduction  
17 (Fig. 3C). To further test the specific requirement of PLD2 activity upon tension  
18 drop, we used PLD1 or PLD2 specific inhibitors, UV0359595 and UV-364739  
19 respectively, to pre-treat the cells for 10 min in 1X PBS and followed by 5-min  
20 hypertonic buffer incubation in the presence of inhibitor. Consistent with the  
21 subcellular localization results, we found that only PLD2 inhibitor blocked the  
22 membrane ruffling induced by tension drop, but not in PLD1 inhibitor-treated  
23 cells (Fig. 3D). Consistent with the data above, only the PLD2 inhibitor blocked  
24 Rh-Dextran internalization induced by hypertonic buffer incubation (Fig. 3E, F).

25 To substantiate the specific requirement of PLD2 in tension drop-induced  
26 macropinocytosis, we knocked down (KD) either PLD1 or PLD2 with two

1 different lentiviral shRNA sequences. Similar with the results of PLD inhibitors,  
2 we observed significant reduction of membrane ruffles and macropinosome  
3 formation in PLD2 KD cells, not PLD1 KD cells (Fig. 4A-C). It is worth noting  
4 that when PLD1 or PLD2 were knocked down, the expression of the other  
5 isoform was slightly increased (Fig. 4D), indicating a compensatory expression  
6 and adaptation phenomenon of cells with PLD depletion.

7 Together, these results suggest that membrane flaccidity induces PA  
8 production and macropinocytosis *via* PLD2 activity. Notably, the intracellular  
9 GFP-PLD1 vesicles were diminished upon tension surge concurrent with the  
10 increased GFP-PLD1 signals on plasma membrane (Fig. S3A), whereas GFP-  
11 PLD2 was less enriched on plasma membrane with hypotonic buffer treatment  
12 (Fig. S3B). These results indicate that both PLDs respond to tension change  
13 and may explain why both an increase and a decrease of membrane tension  
14 caused the increase of total PA amount (Fig. S1B).

15

### 16 **Lipid microdomain responds to tension alteration**

17 Lipid raft has been reported as a mechanosensor and could be disrupted  
18 chemically or mechanically (Oglecka et al., 2014; Petersen et al., 2016). We  
19 wondered whether the integrity of lipid microdomain may be affected by  
20 membrane tension *in vitro* and *in vivo*. To directly observe the effect of  
21 membrane tension on lipid microdomain, we utilized giant unilamellar vesicles  
22 (GUVs), a commonly used membrane template for studying lipid phase  
23 separation, to monitor the size of different lipid phases with L<sub>o</sub> (liquid-ordered)  
24 domain labeled with Topfluor cholesterol and L<sub>d</sub> (liquid-disordered) domain  
25 labeled with rhodamine-PE. In GUVs composed of  
26 DOPC:DPPC:Cholesterol:Topfluor cholesterol: rhodamine-PE with molar ratio

1 at 39:39:20:1:1, we observed phase separation with several  $L_o$  domains  
2 (around 3 – 15 per GUV) when the GUVs were incubated in isotonic buffer (Fig.  
3 5A and video 1). Strikingly, when GUVs were incubated in hypotonic buffer,  
4 those  $L_o$  domains merged into one large domain with numerous small  $L_o$   
5 domains continuously formed and fused together (Fig. 5A and video 2). By  
6 contrast,  $L_o$  domains became smaller in hypertonic buffer where GUVs on a  
7 coverslip resemble flatten tires (Fig. 5A and video 3). These results convincingly  
8 showed that membrane tension affects the integrity of lipid microdomain on  
9 model membrane.

10 To test whether the flaccidity-induced disruption of lipid microdomain could  
11 be observed in a cell, we utilized Alexa flour 647-conjugated cholera toxin B  
12 (CTB) which binds to sphingolipid GM1 to label lipid raft and monitored its  
13 distribution together with GFP-PLD2. Upon different osmotic buffer treatments,  
14 fixation and CTB-AF 647 staining, images of dorsal membranes were acquired  
15 with Stochastic Optical Reconstruction Microscopy (STORM) and analyzed with  
16 ThunderSTORM plugin in ImageJ (Fig. 5B). We observed partial co-localization  
17 between GFP-PLD2 and CTB labeled lipid microdomains in hypertonic buffer-  
18 treated cells; however, the size of CTB-labeled microdomains were similar  
19 among the three conditions. We further used Stimulated Emission Depletion  
20 (STED) Microscopy to image the ventral surface of myoblasts after indicated  
21 osmotic buffer treatments and found no significance difference in the size of  
22 CTB-AF 594 puncta in different buffer-treated cells (Fig. 5Ca-c), though the  
23 CTB clusters seemed less compact in hypertonic buffer-treated cells (arrow  
24 heads in Fig. 5D).

25 To quantitatively examine the effect of tension change in cells, we utilized  
26 nonionic detergent to isolate detergent-resistant membrane under different

1 tension conditions (Lingwood and Simons, 2007). Given the weak signals of  
2 endogenous PLD2 in C2C12 myoblast (Fig. 4D), we ectopically expressed  
3 GFP-PLD2 in myoblast, treated the cells with buffers with distinct osmolarity  
4 and isolated the detergent-resistant membrane with 1% cold TX-100 and  
5 sucrose gradient ultracentrifugation, then detected the distribution of interested  
6 proteins with Western blotting (Fig. 5E-H). In addition to GFP-PLD2, we also  
7 detected other membrane proteins, including PLD1, caveolin-1 and Na<sup>+</sup>-K<sup>+</sup>  
8 ATPase for comparison. Both GFP-PLD2 and caveolin-1 became less resistant  
9 to detergent (less enrichment in fractions 2-4) in cells at a lower tension (Fig.  
10 5F), supporting the idea that tension drop destabilized lipid rafts. In contrast,  
11 lipid rafts remained intact in cells with increased membrane tension (Fig. 5G,H).  
12 Interestingly, PLD1 partially shifted to detergent-resistant membrane fractions  
13 in hypotonic condition that is consistent with its partial redistribution to plasma  
14 membrane upon tension surge (Fig. 5G and S3A). Together, these results  
15 demonstrate that membrane tension facilitates lipid phase separation, thus a  
16 decrease of tension results in lipid raft destabilization *in vitro* and *in vivo*.

17

### 18 **Acute decrease in membrane tension in myotube induces** 19 **macropinosome formation**

20 Given the results above, we have identified a previously underappreciated  
21 pathway which transduces mechanical cue into biochemical signal, *i.e.* the  
22 membrane tension alteration leads to phosphatidic acid production. However,  
23 compared to the pronounced actin polymerization (Fig. 2F), we reasoned the  
24 relatively small amount of membrane ruffles and macropinosome in C2C12  
25 myoblast upon tension drop indicates that PA-induced macropinocytosis  
26 contributes to a limited extent for cell to respond to tension alteration. We thus

1 wonder whether this pathway will be more pronounced in cells with restricted  
2 actin dynamics, for example, in the muscle cells.

3 Skeletal muscle is constantly exposed to mechanical stress in our body thus  
4 has been intensively studied for its ability to cope with increased membrane  
5 tension. Muscle cell is equipped with robust caveolae structures which could  
6 quickly disassemble when membrane tension increases in order to release  
7 membrane reservoir thus relieve the tension surge (Lo et al., 2015; Sinha et al.,  
8 2011). However, little is known about how muscle cells react upon rapid  
9 membrane tension drop following a tension surge. After hypertonic buffer or OS  
10 treatment in the presence of Rh-Dextran, we observed significant amounts of  
11 dextran-containing macropinosomes in C2C12-derived myotubes (Fig. 6A).  
12 Remarkably, the macropinosomes induced by OS were much larger than the  
13 ones in hypertonic buffer-treated myotubes which could be observed under light  
14 microscopy (Fig. 6Bc, red arrow heads). This is probably due to the increase of  
15 membrane area by caveolae disassembly during hypotonic treatment (black  
16 arrow in Fig. 6Bb) thus results in more pronounced macropinosomes than cells  
17 in hypertonic buffer incubation. Furthermore, using time-lapse microscopy, we  
18 found those OS-induced, dextran-positive macropinosomes were also enriched  
19 with PA (Fig. 6C).

20 To examine whether macropinocytosis induced by OS treatment is  
21 physiologically relevant, we stretched and relaxed PABD-GFP expressing  
22 myotubes with radial cell stretcher for 2 min-stretching and 2 min-relaxation in  
23 the presence of Rh-Dextran in medium. After wash and fixation, cells were  
24 imaged with confocal microscopy and we observed some macropinosomes  
25 labeled with dextran and PABD-GFP in myotubes, but not in the control  
26 myotubes which were incubated in dextran without stretching (Fig. 6D). These

1 results demonstrate that acute membrane tension reduction induced by  
2 intensive cell stretching and relaxation, similar to OS treatment, triggers PA  
3 production and macropinocytosis. We hereafter utilized OS-treated myotubes  
4 to observe the kinetic and PLD contribution to tension change-induced  
5 macropinocytosis in myotube.

6 In contrast to what we observed in myoblast, there was no PA-rich membrane  
7 ruffles in myotubes upon OS treatment (Fig. 6B,C). Thus, we carefully  
8 examined the kinetic distribution of Dyn2-mCherry and PABD-GFP in myotube  
9 treated with OS (Fig. 7A). Although there was no membrane ruffling detected in  
10 OS-treated myotubes, we found Dyn2-mCherry enriched at PABD-GFP ring at  
11 membrane during the early stage of OS treatment (Fig. 7A, inset). Interestingly,  
12 only when the macropinosome was formed above the nucleus where much less  
13 cytosolic signals exist that the Dyn2-mCherry could be observed on the  
14 membrane, potentially the intermediate stage of macropinocytosis (Fig. 7A). In  
15 addition, different from the PA-labeled macropinosomes that could last for more  
16 than 10 min in myotubes, the Dyn2-mCherry ring quickly disappeared from  
17 plasma membrane upon OS treatment, suggesting the disappearance of Dyn2  
18 or the disassembly of Dyn2 ring after membrane scission (Antony et al., 2016).  
19 Together, these results suggest that an acute membrane tension decrease also  
20 induced PA and Dyn2-mediated macropinocytosis in myotube though without  
21 displaying a membrane ruffling phenotype.

22 Next, we asked whether PLD is also responsible for the tension change-  
23 induced macropinocytosis in myotube. Interestingly, PLD1-GFP distributed both  
24 on plasma membrane and intracellular vesicles in myotube and partially  
25 distributed to macropinosomes after OS, whereas PLD2 was localized at the  
26 plasma membrane in isotonic condition and became enriched at

1 macropinosomes upon OS treatment (Fig. 7B,C). Consistent with these  
2 observations, OS-induced macropinosome formation in myotubes could only  
3 be blocked by the combined treatment of PLD1 and PLD2 inhibitors (Fig. 7D).  
4 Together, these data indicate that the tension drop-PLD-macropinocytosis  
5 pathway is dominant in myotubes and both PLD1 and PLD2 are involved.

6

## 7 **PA enhances the membrane fission activity of Dyn2**

8 PA is known to promote actin polymerization through PI(4,5)P<sub>2</sub> production  
9 and Rac activation (Liu et al., 2013). However, it has not been addressed  
10 whether PA could directly affect the activity of Dyn2 which is a membrane fission  
11 GTPase essential for phagocytosis and macropinocytosis. (Liu et al., 2008;  
12 Marie-Anais et al., 2016). Furthermore, the fission activity of Dyn2 is tightly  
13 regulated by membrane curvature and lipid composition (Morlot et al., 2012;  
14 Pucadyil and Schmid, 2008; Roux et al., 2010). To test whether PA could  
15 facilitate the activity of Dyn2, we first performed liposome sedimentation assays  
16 to examine the membrane binding ability of purified human Dyn2 to liposomes  
17 containing different amount of PA. There was no significant difference of Dyn2  
18 binding to PA-containing liposomes (Fig. S4A, B). Interestingly, the GTPase  
19 activity of Dyn2 increased in a PA-dependent manner (Fig. S4C). We further  
20 analyzed the assembly of Dyn2 on liposomes and its membrane fission activity  
21 with negative stain electron microscopy and *in vitro* membrane fission assay.  
22 We found that not only did Dyn2 assemble into much ordered and distinct  
23 helical structures in PA-containing liposomes (Fig. S4D), it also showed higher  
24 fission activity on PA-containing membrane template (Fig. S4E). Interestingly,  
25 the fission activity of Dyn2 seemed lower on 10% PA membrane compared to  
26 5% PA membrane which is probably due to the instability and spontaneous

1 membrane breakage on membrane reservoir made with high amount of PA.  
2 Together, PA facilitates the proper assembly of Dyn2 on membrane without  
3 changing the fraction bound, thus enhances its GTP hydrolysis and membrane  
4 fission activities.

5

## 6 **Discussion**

7 Macropinocytosis is a unique endocytic pathway which is initiated by  
8 biochemical stimulations to efficiently uptake nutrients, terminate signaling or  
9 internalize viruses (Buckley and King, 2017). In this study, we identified a PLD-  
10 dependent, but PIP<sub>3</sub>-independent pathway of macropinocytosis that is induced  
11 by acute membrane tension drop which leads to lipid raft destabilization, PLD2  
12 activity, PA production and macropinosome formation (Fig. 8). This particular  
13 mechanotransduction pathway contributes differentially among cell types and  
14 is much pronounced in myotubes and reflects the molecular mechanism of  
15 muscle cell coping with intensive stretching and relaxation during physical  
16 exercise.

17 Lipid raft is well perceived as a signaling platform given its enrichment of  
18 unique receptors. Here we find it also serves as a mechanosensor which  
19 undergoes disruption upon membrane tension alteration to activate PLD2. The  
20 effect of membrane tension of the coarsening of lipid microdomains *in vitro* has  
21 been largely studied and modeled theoretically (Akimov et al., 2007; Chen and  
22 Santore, 2014; Hamada et al., 2011; Oglecka et al., 2014; Portet et al., 2012;  
23 Ursell et al., 2009). It is believed that the membrane tension sensitivity of lipid  
24 microdomain may arise from (1) the increase of line tension when membrane  
25 tension rises (Akimov et al., 2007), or (2) the kinetics of microdomain  
26 coalescence affected by membrane tension (Ursell et al., 2009). Line tension is



1 the boundary energy between  $L_o$  and  $L_d$  domains that comes from the difference  
2 of their membrane thickness, also known as hydrophobic mismatch. Therefore,  
3 it is intuitive to imagine that membrane with lower tension would have lower  
4 boundary energy thus the total circumference of  $L_o$  could increase, *i.e.* a larger  
5 number of  $L_o$  domains with smaller diameters (Fig. 8). With that, it is tempting  
6 to hypothesize that PLD2 catalyzes reactions at the boundary of lipid rafts and  
7 the effect of membrane tension on lipid raft is to increase the amount of phase  
8 boundaries which leads to higher PLD2 activity.

9 The activity of PLDs has been reported to be sensitive to mechanical stress  
10 such as mechanical stretching, membrane tension surge or osmotic stress (Diz-  
11 Munoz et al., 2016; Hornberger et al., 2006; Tomassen et al., 2004). However,  
12 how exactly PLD is activated upon mechanical stimulation remains unclear.  
13 Here, we found that PLD1 and PLD2 distribute differently and react to distinct  
14 tension alterations in myoblasts. Nonetheless, it is puzzling that both an  
15 increase and a decrease of membrane tension result in elevated total amount  
16 of PA, yet resulted in different cellular outcomes: actin depolymerization or  
17 polymerization, respectively (Diz-Munoz et al., 2016; Tsujita et al., 2015). Since  
18 the subcellular location of PA and its surrounding proteins determine where and  
19 what kind of cellular event it would participate (Colley et al., 1997; Du et al.,  
20 2004; Teng et al., 2015; Yang and Frohman, 2012), it is plausible that elevated  
21 PA in different membrane compartment would trigger distinct cellular processes.  
22 Furthermore, given that high membrane tension directly inhibits actin  
23 polymerization and the force feedback mechanism on actin assembly (Bieling  
24 et al., 2016; Houk et al., 2012; Tsujita et al., 2015), the effects of membrane  
25 tension on PA production are important contributors to the final phenotype  
26 outputs. Further studies are needed to elucidate the feedback regulation of

1 membrane tension, local PA production and actin polymerization in order to fully  
2 deciphering the complexity of this network.

3 PA has a small phosphate head group thus could create lipid packing defect  
4 in membrane by its nature (Bigay and Antonny, 2012). Here we found that  
5 membrane with PA facilitates the assembly of Dyn2, but not its binding, which  
6 is reminiscent of the effect of membrane curvature on Dyn2 assembly and  
7 activity (Liu et al., 2011a; Roux et al., 2010). Curved membrane provides more  
8 lipid packing defect thus facilitates the insertion of the PH domain in Dyn2 to  
9 have better assembly. With that, membrane with more PA may have more lipid  
10 packing defects due to its geometry. Consistent with this notion, PA has been  
11 reported to induce the insertion of Dyn1 into lipid monolayer (Burger et al.,  
12 2000). Together, these results suggest that Dyn2 assembly is better positioned  
13 for its fission activity on PA-containing membrane without the prerequisite of  
14 membrane curvature.

15 The mechanotransduction pathway we discovered here supports the concept  
16 that membrane tension is an integrator for biochemical and physical cues to  
17 regulate membrane trafficking and actin organization. By examining the  
18 molecular basis of this regulatory network, we uncovered the mechanisms  
19 underpinning membrane organization and PLD activity. Given the ubiquitous  
20 nature of forces, we suspect there are more molecules that sense and/or are  
21 regulated by membrane tension. Our findings pave the way for future studies  
22 of the mechanical regulation on membrane and cell physiology.

23

## 24 **Materials and Methods**

### 25 **Cell Culture, Transfection and Infection**

26 Mouse-derived C2C12 myoblasts (American Type Culture Collection, CRL-

1 1772) were cultured in growth medium (GM), DMEM supplemented with 2 mM  
2 L-glutamine, 1 mM sodium pyruvate, antibiotics and 10% fetal bovine serum  
3 (Gibco). To induce differentiation, C2C12 were seeded onto laminin  
4 (Invitrogen)-coated glass-bottom dish (MatTek) or coverslips in GM, grown to  
5 90% confluency, and then switched to differentiation medium (DM), which is the  
6 same as GM but with 2% horse serum (Gibco). This time point was considered  
7 as day 0 of differentiation. For transfection, cells at 70% confluency were  
8 transfected with the desired DNA constructs using Lipofectamine 2000  
9 (Invitrogen), as recommended by the manufacturer.

10 For PLD knockdown experiments, lentiviruses with shRNA sequences:  
11 5'-CCCAATGATGAAGTACACAAT-3' or 5'-GCTTGGTAATAAGTGGATAAA-3'  
12 for PLD1; whereas 5'-CCTTCCTGTCACCAAGTTCAA-3' or 5'-  
13 CATGTCTTTCTATCGCAATTA-3' for PLD2, were prepared. C2C12 myoblast  
14 were infected with control or PLD-shRNA containing lentiviruses and selected  
15 with 2 µg/ml puromycin for 3 days then subjected to transfection and osmotic  
16 buffer treatments.

17

## 18 **Reagents**

19 PLD1 inhibitor UV0359595 was purchased from Cayman Chemical. PLD2  
20 inhibitor UV0364739 was from Tocris Bioscience. Rh-dextran, CTB-AF 647 and  
21 CTB-AF 594 were from Invitrogen. Anti-PLD2 antibody was purchased from  
22 Abcam, anti-PLD1 and anti-caveolin-1 antibodies were from Cell Signaling  
23 Technology, anti-Na,K-ATPase antibody was from Santa Cruz Biotechnology,  
24 and anti-GFP antibody was a gift from Fang-Jen S. Lee in National Taiwan  
25 University. All lipids were purchased from Avanti Polar Lipids.

26

## 1 **Microscopy**

2 For live-cell microscopy, cells transfected with interested DNA constructs were  
3 seeded on glass-bottom dish (MatTek) and imaged with Zeiss inverted  
4 microscopy Axio Observer Z1 or spinning disc confocal microscope (Carl Zeiss  
5 Observer SD) at 37 °C with 63x, 1.35-NA oil-immersion objective. To image  
6 fixed cells, sample slides were observed with confocal microscopy LSM700 with  
7 63x, 1.35-NA oil-immersion objective (Carl Zeiss, Jena, Germany).

8 For super-resolution microscopy, we used both STORM and STED to  
9 image cells upon hyper- or hypo-osmotic shock. For STORM, GFP-PLD2  
10 transfected C2C12 myoblasts were subjected to iso- (1X PBS), hypo- (0.5X  
11 PBS), or hypertonic (1X PBS with 150 mM sucrose) buffers for 5 minutes. After  
12 4% paraformaldehyde fixation and intensive PBS wash, cells were incubated  
13 with Alexa fluor 647-cholera toxin B (CTB, 1 µg/ml, Invitrogen) overnight at 4  
14 °C. After PBS wash, the STORM buffer (50 µL beta-mercaptoethanol (BME),  
15 1.85 mM monoethanolamine (MEA), 0.25 M NaCl, 50 mM Tris with a final pH  
16 of 9.0) was added with protocatechuic acid (PCA)/protocatechuate-3,4-  
17 dioxygenase (PCD) O<sub>2</sub>-scavenging system immediately before imaging was  
18 used for switching the fluorophores. The imaging was performed at the Single  
19 Molecule Analysis in Real-Time (SMART) Center, University of Michigan, using  
20 computer-controlled IOX-81 Olympus microscope with 60x oil 1.49NA  
21 (APON60XOTIRFM) and an Andor iXon Ultra EM-CCD camera. 10000 images  
22 of Af 647-CTB excited with 640 nm (Coherent Cube) laser were collected at  
23 100 ms exposure time using stream acquisition. After acquisition of 5000  
24 images with 640 nm laser illumination, sample was co-exposed to 405 nm  
25 (Coherent Cube) laser to excite fluorophores to triplet state. Samples were  
26 exposed to both 640 nm and 405 nm until acquisition of 10000 images. A GFP-

1 PLD2 image was taken before and after the STORM imaging. The STORM  
2 image reconstruction was performed using ThunderSTORM plugin in ImageJ,  
3 using difference of Gaussian image filtering and sub-pixel localization of  
4 molecules using maximum likelihood fitting with integrated Gaussian PSF.

5 For STED imaging, cells treated with different osmotic buffers and  
6 followed by fixation and Alexa fluor 594-CTB (Invitrogen) staining were  
7 mounted in ProLong Gold antifade reagent (Invitrogen) and imaged under Leica  
8 TSC SP8 X STED 3X with 100x oil objective 1.4NA (STED). Samples were  
9 acquired with excitation laser 594 nm, 660 nm depletion laser and Hybrid  
10 Detector (Leica HyD).

11

## 12 **PA measurement**

13 Total PA content was measured with a coupled enzymatic reaction assay (Total  
14 Phosphatidic Acid Assay Kit, Cell Biolabs, Inc.). Briefly, cells treated with buffers  
15 of different osmolarities were scraped from dishes. While 10% of the samples  
16 were used for protein concentration analysis, the rest of the samples were  
17 subjected to total lipid extraction by methanol and chloroform. After drying with  
18 SpeedVac, the lipid film was dissolved and the amount of PA was determined  
19 by a fluorometric assay that firstly hydrolyzed PA to glycerol-3-phosphate by  
20 lipase. Next, glycerol-3-phosphate product was oxidized by glycerol-3-  
21 phosphate oxidase, producing hydrogen peroxide which reacted with a  
22 fluorometric probe with excitation/emission wavelength at 530-560 nm/585-  
23 595nm. The PA amount was determined as fluorescence intensity (A.U.)/protein  
24 concentration ( $\mu\text{g}$ ).

25

## 26 **Macropinocytosis assay**

1 To monitor macropinocytosis, myoblasts or myotubes were incubated with  
2 indicated osmotic buffers containing 1  $\mu\text{g/ml}$  Tetramethylrhodamine Dextran  
3 (Thermo Fisher Scientific). After PBS wash for five times, cells were fixed and  
4 imaged with confocal microscopy. To monitor macropinocytosis in myotube  
5 upon cell stretching, myoblasts were seeded on laminin-coated flexcell silicon  
6 dish and were induced to differentiate for five days after PABD-GFP transfection.  
7 Day-5 differentiated myotubes were incubated in DM medium containing 1  
8  $\mu\text{g/ml}$  Rh-Dextran and subjected to radial stretching of 2 min at 20% extension  
9 and followed by 2 min resting. After intensive wash, fixation and mounting, cells  
10 were imaged by confocal microscopy.

11

## 12 **Fractionations of detergent-resistant membrane domains**

13 Detergent-resistant membrane domains were purified from cells exposed to  
14 buffers with different osmolarities as previously described (Czarny et al., 1999).  
15 Briefly, after incubation with buffers of different osmolarity, myoblasts (two sub-  
16 confluent 100-mm dishes) were scraped into ice-cold buffers with the same  
17 osmolarity as previous treatment. After centrifugation, the pelleted cells were  
18 re-suspended with 0.8 ml lysis buffer (50 mM Tris, pH 7.4, 150 mM NaCl, 2 mM  
19 EDTA, 1% Triton X-100 and proteinase inhibitor cocktail (Roche)). After 30 min  
20 incubation at 4 °C, cell extracts were adjusted to 40% sucrose by addition of  
21 0.8 ml of the above buffer (minus Triton X-100) containing 80% sucrose and is  
22 then placed at the bottom of a 5-ml ultracentrifuge tube. A step sucrose gradient  
23 was formed above the lysate by adding 2.4 ml of 35% and 0.8 ml of 5% sucrose  
24 solutions, and the tubes were centrifuged at 150,000  $\times g$  for 8 h in a SW-55 Ti  
25 rotor at 4 °C. Fractions (0.4 ml) were collected from the top of the gradient and  
26 analyzed with Western blotting.

1

## 2 **Liposome and GUV preparation**

3 For liposomes preparation, lipid mixtures (DOPC:DOPS:PI(4,5)P<sub>2</sub>:DOPA at 80-  
4 70:15:5:0-10) were dried, rehydrated in HK buffer (20 mM HEPES (pH 7.5), 150  
5 mM KCl) and subjected to a series of freeze–thaw cycles before extrusion  
6 through polycarbonate membranes (Whatman) with pore sizes of 100 or 400  
7 nm using an Avanti Mini-Extruder. For GUV formation, lipid mixtures  
8 (DOPC:DPPC:cholesterol:Rhodamine-PE:Topfluor-cholesterol at 39:39:20:1:1)  
9 were dried on a ITO-coated glass slide and electroformation was conducted *via*  
10 applying 3.5V for 3 hour in 400 mM sucrose at 50 °C. To monitor the effect of  
11 tension changes on lipid phase separation, freshly prepared GUVs were  
12 subjected to isotonic buffer (400 mM glucose), hypertonic buffer (500 mM  
13 glucose) or hypotonic buffer (300 mM glucose) and imaged with inverted  
14 fluorescence microscopy immediately.

15

## 16 **Myotube stretching and imaging**

17 C2C12 cells seeded on laminin-coated BioFlex Culture Plate (Flexcell) was  
18 transfected with PABD-GFP and differentiated into myotube by DM incubation.  
19 After five days of differentiation, Rhodamine-Dextran was added into the  
20 medium to reach 1 µg/ml, and myotube was subjected to static, radial stretching  
21 with 20% strain by a Flexcell FX-5000T Tension System for 2 min and followed  
22 by no stretching for 2 mins; whereas control cells were incubated in Rh-Dextran  
23 containing medium for 4 mins without mechanical stress. Samples were then  
24 washed with PBS for 5 times, fixed with 4% formaldehyde for 30 min, cut from  
25 the plates and mounted with mounting medium and coverslip. PABD-GFP and  
26 Rh-Dextran signals were imaged with confocal microscopy (Zeiss, LSM700).

1

## 2 **Dynamin purification and activity analysis**

3 Recombinant human Dyn2 was purified from insect cells and stored at -80 °C  
4 as previously described (Liu et al., 2011b). To determine membrane binding,  
5 0.5 μM Dyn2 were incubated with 150 μM, 400 nm-sized liposomes with  
6 different amount of PA at 37 °C for 15 min. After centrifugation at 20,000 xg for  
7 30 min, liposome-bound Dyn2 was pelleted down and was quantified by SDS-  
8 PAGE analysis. To analyze GTPase activity, GTP hydrolysis by Dyn2 was  
9 measured as a function of time using a colorimetric malachite green assay to  
10 detect the release of inorganic phosphate (Leonard et al., 2005). Briefly, 0.5 μM  
11 Dyn2 was incubated with 150 μM liposomes of different PA concentrations in a  
12 buffer containing 20 mM HEPES, pH 7.4, 150 mM KC, 1 mM GTP and 2 mM  
13 MgCl<sub>2</sub>. Aliquots were taken at several time points, free phosphate was  
14 determined using malachite green, and rates of hydrolysis were calculated.  
15 Fission activity of dynamin was measured as previously reported (Liu et al.,  
16 2011b). Briefly, the supported bilayers with excess membrane reservoir  
17 (SUPER) templates with different amount PA were incubated with 1 mM MgCl<sub>2</sub>,  
18 1 mM GTP, and indicated dynamin for 30 min at room temperature. The  
19 released vesicles were separated from SUPER template by 260 xg swing-out  
20 centrifugation. The fission activity is expressed as percentage of total  
21 fluorescence on SUPER templates.

22

## 23 **Transmission electron microscopy**

24 To visualize the assembly of Dyn2 on liposomes, 1.0 μM dynamin was mixed  
25 with 25 μM liposomes with different lipid compositions and incubated at 37 °C  
26 for 10 min. The mixture was then adsorbed onto carbon-coated, glow



1 discharged grids and stained with 1% uranyl acetate. Images were collected  
2 using a Hitachi H-7650 EM at 75 kV and a nominal magnification of  $\times 120,000$ .

3

#### 4 **Statistical analysis**

5 Quantitative data were expressed as mean  $\pm$  SD of at least three independent  
6 experiments. All data were analyzed with One-way ANOVA, except the DRM  
7 isolation result was analyzed with Student's *t*-test.  $p < 0.05$  was considered as  
8 statistical significance  $p$  values were indicated as \*,  $p < 0.05$ ; \*\*,  $p < 0.01$ ; \*\*\*,  
9  $p < 0.001$ .

10

#### 11 **Acknowledgements**

12 We thank Dr. Do Sik Min (Pusan National University) for the GFP-PLD1 and  
13 GFP-PLD2 plasmids. We are grateful to Dr. Chau-Hwang Lee (Academia Sinica)  
14 for the assistance in GUV preparation and Dr. Damon Hoff (University of  
15 Michigan) for assistance with STORM imaging. We also thank the Single  
16 Molecule Analysis in Real-Time (SMART) Center of the University of Michigan,  
17 seeded by NSF MRI-R2-ID award DBI-0959823 to Nils G. Walter. This work  
18 was supported by Ministry of Science and Technology grant 107-3017-F-002-  
19 002 and National Taiwan University grant NTU-CDP-106R7808 to Y.W. Liu and  
20 NSF-1612917 to A.P. Liu.

21

#### 22 **Author contributions**

23 All authors participated in experimental design. JL, JJ, MCC, SSL, YCC, YAS  
24 and YWL performed experiments. JL, JJ, APL and YWL analyzed data and  
25 wrote the manuscript. APL and YWL supervised the project.

26

## 1 **Declarations of interests**

2 The authors declare no competing financial interests.

3

## 4 **References**

5 **Akimov, S. A., Kuzmin, P. I., Zimmerberg, J. and Cohen, F. S.** (2007). Lateral  
6 tension increases the line tension between two domains in a lipid bilayer membrane.  
7 *Physical Review E* **75**.

8 **Antonescu, C. N., Danuser, G. and Schmid, S. L.** (2010). Phosphatidic acid plays a  
9 regulatory role in clathrin-mediated endocytosis. *Mol Biol Cell* **21**, 2944-52.

10 **Antonny, B., Burd, C., De Camilli, P., Chen, E., Daumke, O., Faelber, K., Ford, M.,**  
11 **Frolov, V. A., Frost, A., Hinshaw, J. E. et al.** (2016). Membrane fission by dynamin: what  
12 we know and what we need to know. *Embo Journal* **35**, 2270-2284.

13 **Bieling, P., Li, T. D., Weichsel, J., McGorty, R., Jreij, P., Huang, B., Fletcher, D. A.**  
14 **and Mullins, R. D.** (2016). Force Feedback Controls Motor Activity and Mechanical  
15 Properties of Self-Assembling Branched Actin Networks. *Cell* **164**, 115-127.

16 **Bigay, J. and Antonny, B.** (2012). Curvature, lipid packing, and electrostatics of  
17 membrane organelles: defining cellular territories in determining specificity. *Dev Cell*  
18 **23**, 886-95.

19 **Boulant, S., Kural, C., Zeeh, J. C., Ubelmann, F. and Kirchhausen, T.** (2011). Actin  
20 dynamics counteract membrane tension during clathrin-mediated endocytosis. *Nat*  
21 *Cell Biol* **13**, 1124-31.

22 **Brown, H. A., Henage, L. G., Preininger, A. M., Xiang, Y. and Exton, J. H.** (2007).  
23 Biochemical analysis of phospholipase D. *Methods Enzymol* **434**, 49-87.

24 **Buckley, C. M. and King, J. S.** (2017). Drinking problems: mechanisms of  
25 macropinosome formation and maturation. *FEBS J* **284**, 3778-3790.

26 **Burger, K. N. J., Demel, R. A., Schmid, S. L. and de Kruijff, B.** (2000). Dynamin is  
27 membrane-active: Lipid insertion is induced by phosphoinositides and phosphatidic  
28 acid. *Biochemistry* **39**, 12485-12493.

29 **Chen, D. and Santore, M. M.** (2014). Large effect of membrane tension on the  
30 fluid-solid phase transitions of two-component phosphatidylcholine vesicles. *Proc Natl*  
31 *Acad Sci U S A* **111**, 179-84.

32 **Colley, W. C., Sung, T. C., Roll, R., Jenco, J., Hammond, S. M., Altshuler, Y.,**  
33 **BarSagi, D., Morris, A. J. and Frohman, M. A.** (1997). Phospholipase D2, a distinct  
34 phospholipase D isoform with novel regulatory properties that provokes cytoskeletal  
35 reorganization. *Current Biology* **7**, 191-201.

36 **Conner, S. D. and Schmid, S. L.** (2003). Regulated portals of entry into the cell.  
37 *Nature* **422**, 37-44.

- 1        **Czarny, M., Lavie, Y., Fiucci, G. and Liscovitch, M.** (1999). Localization of  
2 phospholipase D in detergent-insoluble, caveolin-rich membrane domains -  
3 Modulation by caveolin-1 expression and caveolin-1(82-101). *Journal of Biological*  
4 *Chemistry* **274**, 2717-2724.
- 5        **Dai, J. and Sheetz, M. P.** (1995). Regulation of endocytosis, exocytosis, and shape  
6 by membrane tension. *Cold Spring Harb Symp Quant Biol* **60**, 567-71.
- 7        **Diz-Munoz, A., Fletcher, D. A. and Weiner, O. D.** (2013). Use the force: membrane  
8 tension as an organizer of cell shape and motility. *Trends Cell Biol* **23**, 47-53.
- 9        **Diz-Munoz, A., Thurley, K., Chintamen, S., Altschuler, S. J., Wu, L. F., Fletcher, D.**  
10 **A. and Weiner, O. D.** (2016). Membrane Tension Acts Through PLD2 and mTORC2 to  
11 Limit Actin Network Assembly During Neutrophil Migration. *PLoS Biol* **14**, e1002474.
- 12        **Doherty, G. J. and McMahon, H. T.** (2009). Mechanisms of endocytosis. *Annu Rev*  
13 *Biochem* **78**, 857-902.
- 14        **Du, G. W., Huang, P., Liang, B. T. and Frohman, M. A.** (2004). Phospholipase D2  
15 localizes to the plasma membrane and regulates angiotensin II receptor endocytosis.  
16 *Molecular Biology of the Cell* **15**, 1024-1030.
- 17        **Gauthier, N. C., Masters, T. A. and Sheetz, M. P.** (2012). Mechanical feedback  
18 between membrane tension and dynamics. *Trends Cell Biol* **22**, 527-35.
- 19        **Hamada, T., Kishimoto, Y., Nagasaki, T. and Takagi, M.** (2011). Lateral phase  
20 separation in tense membranes. *Soft Matter* **7**, 9061-9068.
- 21        **Hornberger, T. A., Chu, W. K., Mak, Y. W., Hsiung, J. W., Huang, S. A. and Chien,**  
22 **S.** (2006). The role of phospholipase D and phosphatidic acid in the mechanical  
23 activation of mTOR signaling in skeletal muscle. *Proc Natl Acad Sci U S A* **103**, 4741-6.
- 24        **Houk, A. R., Jilkine, A., Mejean, C. O., Boltyanskiy, R., Dufresne, E. R., Angenent,**  
25 **S. B., Altschuler, S. J., Wu, L. F. and Weiner, O. D.** (2012). Membrane tension maintains  
26 cell polarity by confining signals to the leading edge during neutrophil migration. *Cell*  
27 **148**, 175-88.
- 28        **Jiang, Y., Sverdlov, M. S., Toth, P. T., Huang, L. S., Du, G. W., Liu, Y. Y., Natarajan,**  
29 **V. and Minshall, R. D.** (2016). Phosphatidic Acid Produced by RalA-activated PLD2  
30 Stimulates Caveolae-mediated Endocytosis and Trafficking in Endothelial Cells. *Journal*  
31 *of Biological Chemistry* **291**, 20729-20738.
- 32        **Leonard, M., Song, B. D., Ramachandran, R. and Schmid, S. L.** (2005). Robust  
33 colorimetric assays for dynamin's basal and stimulated GTPase activities. *Methods*  
34 *Enzymol* **404**, 490-503.
- 35        **Levin, R., Grinstein, S. and Schlam, D.** (2015). Phosphoinositides in phagocytosis  
36 and macropinocytosis. *Biochim Biophys Acta* **1851**, 805-23.
- 37        **Lingwood, D. and Simons, K.** (2007). Detergent resistance as a tool in membrane  
38 research. *Nat Protoc* **2**, 2159-65.

- 1        **Liu, A. P., Botelho, R. J. and Antonescu, C. N.** (2017). The big and intricate dreams  
2 of little organelles: Embracing complexity in the study of membrane traffic. *Traffic* **18**,  
3 567-579.
- 4        **Liu, Y., Su, Y. and Wang, X.** (2013). Phosphatidic acid-mediated signaling. *Adv Exp*  
5 *Med Biol* **991**, 159-76.
- 6        **Liu, Y. W., Neumann, S., Ramachandran, R., Ferguson, S. M., Pucadyil, T. J. and**  
7 **Schmid, S. L.** (2011a). Differential curvature sensing and generating activities of  
8 dynamin isoforms provide opportunities for tissue-specific regulation. *Proceedings of*  
9 *the National Academy of Sciences of the United States of America* **108**, E234-42.
- 10       **Liu, Y. W., Neumann, S., Ramachandran, R., Ferguson, S. M., Pucadyil, T. J. and**  
11 **Schmid, S. L.** (2011b). Differential curvature sensing and generating activities of  
12 dynamin isoforms provide opportunities for tissue-specific regulation. *Proc Natl Acad*  
13 *Sci U S A* **108**, E234-42.
- 14       **Liu, Y. W., Surka, M. C., Schroeter, T., Lukiyanchuk, V. and Schmid, S. L.** (2008).  
15 Isoform and splice-variant specific functions of dynamin-2 revealed by analysis of  
16 conditional knock-out cells. *Mol Biol Cell* **19**, 5347-59.
- 17       **Lo, H. P., Nixon, S. J., Hall, T. E., Cowling, B. S., Ferguson, C., Morgan, G. P.,**  
18 **Schieber, N. L., Fernandez-Rojo, M. A., Bastiani, M., Floetenmeyer, M. et al.** (2015).  
19 The caveolin-cavin system plays a conserved and critical role in mechanoprotection of  
20 skeletal muscle. *J Cell Biol* **210**, 833-49.
- 21       **Marie-Anais, F., Mazzolini, J., Herit, F. and Niedergang, F.** (2016). Dynamin-Actin  
22 Cross Talk Contributes to Phagosome Formation and Closure. *Traffic* **17**, 487-99.
- 23       **Masters, T. A., Pontes, B., Viasnoff, V., Li, Y. and Gauthier, N. C.** (2013). Plasma  
24 membrane tension orchestrates membrane trafficking, cytoskeletal remodeling, and  
25 biochemical signaling during phagocytosis. *Proc Natl Acad Sci U S A* **110**, 11875-80.
- 26       **Morlot, S., Galli, V., Klein, M., Chiaruttini, N., Manzi, J., Humbert, F., Dinis, L.,**  
27 **Lenz, M., Cappello, G. and Roux, A.** (2012). Membrane Shape at the Edge of the  
28 Dynamin Helix Sets Location and Duration of the Fission Reaction. *Cell* **151**, 619-629.
- 29       **Nassoy, P. and Lamaze, C.** (2012). Stressing caveolae new role in cell mechanics.  
30 *Trends Cell Biol* **22**, 381-9.
- 31       **Oglecka, K., Rangamani, P., Liedberg, B., Kraut, R. S. and Parikh, A. N.** (2014).  
32 Oscillatory phase separation in giant lipid vesicles induced by transmembrane osmotic  
33 differentials. *Elife* **3**, e03695.
- 34       **Petersen, E. N., Chung, H. W., Nayeboadri, A. and Hansen, S. B.** (2016). Kinetic  
35 disruption of lipid rafts is a mechanosensor for phospholipase D. *Nat Commun* **7**,  
36 13873.
- 37       **Portet, T., Gordon, S. E. and Keller, S. L.** (2012). Increasing membrane tension  
38 decreases miscibility temperatures; an experimental demonstration via micropipette

- 1 aspiration. *Biophys J* **103**, L35-7.
- 2 **Pucadyil, T. J. and Schmid, S. L.** (2008). Real-time visualization of dynamin-  
3 catalyzed membrane fission and vesicle release. *Cell* **135**, 1263-75.
- 4 **Roux, A., Koster, G., Lenz, M., Sorre, B., Manneville, J. B., Nassoy, P. and**  
5 **Bassereau, P.** (2010). Membrane curvature controls dynamin polymerization. *Proc*  
6 *Natl Acad Sci U S A* **107**, 4141-6.
- 7 **Saleem, M., Morlot, S., Hohendahl, A., Manzi, J., Lenz, M. and Roux, A.** (2015).  
8 A balance between membrane elasticity and polymerization energy sets the shape of  
9 spherical clathrin coats. *Nature Communications* **6**.
- 10 **Scita, G. and Di Fiore, P. P.** (2010). The endocytic matrix. *Nature* **463**, 464-73.
- 11 **Shi, Z. and Baumgart, T.** (2015). Membrane tension and peripheral protein  
12 density mediate membrane shape transitions. *Nature Communications* **6**.
- 13 **Sinha, B., Koster, D., Ruez, R., Gonnord, P., Bastiani, M., Abankwa, D., Stan, R.**  
14 **V., Butler-Browne, G., Védie, B., Johannes, L. et al.** (2011). Cells respond to  
15 mechanical stress by rapid disassembly of caveolae. *Cell* **144**, 402-13.
- 16 **Tan, X., Heureaux, J. and Liu, A. P.** (2015). Cell spreading area regulates clathrin-  
17 coated pit dynamics on micropatterned substrate. *Integr Biol (Camb)* **7**, 1033-43.
- 18 **Teng, S., Stegner, D., Chen, Q., Hongu, T., Hasegawa, H., Chen, L., Kanaho, Y.,**  
19 **Nieswandt, B., Frohman, M. A. and Huang, P.** (2015). Phospholipase D1 facilitates  
20 second-phase myoblast fusion and skeletal muscle regeneration. *Mol Biol Cell* **26**, 506-  
21 17.
- 22 **Tomassen, S. F., van der Wijk, T., de Jonge, H. R. and Tilly, B. C.** (2004). Activation  
23 of phospholipase D by osmotic cell swelling. *FEBS Lett* **566**, 287-90.
- 24 **Tsujita, K., Takenawa, T. and Itoh, T.** (2015). Feedback regulation between plasma  
25 membrane tension and membrane-bending proteins organizes cell polarity during  
26 leading edge formation. *Nat Cell Biol* **17**, 749-58.
- 27 **Ursell, T. S., Klug, W. S. and Phillips, R.** (2009). Morphology and interaction  
28 between lipid domains. *Proceedings of the National Academy of Sciences of the United*  
29 *States of America* **106**, 13301-13306.
- 30 **Weinberg, J. and Drubin, D. G.** (2012). Clathrin-mediated endocytosis in budding  
31 yeast. *Trends Cell Biol* **22**, 1-13.
- 32 **Xie, Z., Ho, W. T. and Exton, J. H.** (2002). Functional implications of post-  
33 translational modifications of phospholipases D1 and D2. *Biochim Biophys Acta* **1580**,  
34 9-21.
- 35 **Yang, C. Y. and Frohman, M. A.** (2012). Mitochondria: signaling with phosphatidic  
36 acid. *Int J Biochem Cell Biol* **44**, 1346-50.
- 37 **Yoshida, S., Pacitto, R., Inoki, K. and Swanson, J.** (2018). Macropinocytosis,  
38 mTORC1 and cellular growth control. *Cell Mol Life Sci* **75**, 1227-1239.

1           Zeniou-Meyer, M., Zabari, N., Ashery, U., Chasserot-Golaz, S., Haeberle, A. M.,  
2 Demais, V., Bailly, Y., Gottfried, I., Nakanishi, H., Neiman, A. M. et al. (2007).  
3 Phospholipase D1 production of phosphatidic acid at the plasma membrane promotes  
4 exocytosis of large dense-core granules at a late stage. *J Biol Chem* **282**, 21746-57.

5

## 6 **Figure Legends**

### 7 **Figure 1. Effects of membrane tension manipulation on PA in myoblast.**

8 (A) An increase of membrane tension suppresses PA-rich ruffles at plasma  
9 membrane. PABD-GFP expressing C2C12 myoblast was first imaged in  
10 isotonic buffer (Aa, 1X PBS), and two images were further captured after 2 min  
11 of hypotonic buffer (Ab, 0.5XPBS) and additional 2 min of 1X PBS recovery  
12 (Ac). Boxed areas were magnified and shown on the right panel. (B) A decrease  
13 of tension induces PA enrichment at plasma membrane. PABD-GFP expressing  
14 myoblast was first imaged in isotonic buffer (Ba), and two images were further  
15 captured after 2 min (Bb) or 5 min (Bc) after hypertonic buffer treatment (1XPBS  
16 + 150 mM sucrose). (C) Quantification of membrane ruffling in cells treated with  
17 isotonic or 5-min hypertonic buffers. Ruffling phenotypes were divided into four  
18 categories with different levels or areas of membrane wave. (D) Kinetic change  
19 of total PA amount in myoblasts upon hypertonic buffer treatment. C2C12  
20 myoblasts treated with hypertonic buffer for indicated time period were  
21 harvested and analyzed with total PA assay and normalized with the protein  
22 concentration. Fold change of the PA/protein ratio was compared with isotonic  
23 buffer treatment. Scale bars, 10  $\mu$ m. \*,  $p < 0.05$ .

24

### 25 **Figure 2. Distribution of membrane proteins and lipids upon sudden** 26 **decrease of membrane tension.**

27 (A-F) Myoblasts co-transfected with indicated plasmids were treated with hypertonic buffer for 5 mins. The tension  
28 drop-induced PA-rich ruffles were examined for its enrichment with F-actin  
29 (Lifeact-RFP), Dyn2, clathrin-coated pit adaptor ( $\mu$ 2-GFP), PI(4,5)P<sub>2</sub> (PLC-PH-  
30 GFP) and PI(3,4,5)P<sub>3</sub> (Akt-PH-GFP). (G-J) Spinning disc confocal microscopy  
31 images of myoblast incubated in a hypertonic buffer. PABD-GFP and Dyn2-  
32 mCherry co-transfected myoblast was imaged with z-stack confocal  
33 microscopy before and after 5 min incubation in a hypertonic buffer. The 3D  
34 reconstructed images (G,H) and orthogonal views (I,J) were shown to illustrate  
35 dorsal membrane ruffling (open arrow heads in H and white arrow heads in J)  
36 upon tension drop. Scale bars, 10  $\mu$ m.

37

### 38 **Figure 3. Acute membrane tension drop induces PLD2-dependent**

1 **macropinocytosis.** (A) Macropinocytosis is induced upon hypertonic buffer or  
2 OS treatment. PABD-GFP expressing myoblasts were incubated with indicated  
3 buffer plus 1  $\mu\text{g/ml}$  Rh-Dextran, including 5 min isotonic (1X PBS), 5 min  
4 hypertonic (1XPBS + 150 mM sucrose) or 2 min hypotonic (0.5X PBS without  
5 dextran) followed with isotonic (1X PBS with dextran) for OS. After wash and  
6 fixation, cells were imaged with confocal microscopy and the maximum intensity  
7 projection images were generated. (B) The number of macropinosomes (Rh-  
8 Dextran containing vesicle larger than 0.5  $\mu\text{m}$  in diameter) were quantified and  
9 divided into three populations as indicated. Percentage of each population were  
10 compared with the isotonic buffer-treated cells, and over 160 cells for each  
11 condition were analyzed. (C) PLD1 and PLD2 distribution upon membrane  
12 tension drop. Myoblasts expressing GFP-PLD1 or GFP-PLD2 were imaged  
13 before (Ca and Cc) and after (Cb and Cd) hypertonic buffer treatment. (D-F)  
14 Effect of PLD inhibitors on tension drop-induced membrane ruffles and  
15 macropinocytosis. PABD-GFP expressing myoblasts were pretreated with  
16 indicated PLD inhibitors, 500 nM for 10 min in 1X PBS, and followed by inhibitor-  
17 containing hypertonic buffer for another 5 min (D) or Rh-Dextran containing  
18 hypertonic buffer and OS treatment (E,F). Live cell imaging (D) or confocal  
19 imaging on fixed cells (E) were performed respectively. (F) The population of  
20 cells with different numbers of macropinosome were quantified with 150 cells  
21 of each condition and compared with vehicle control. Scale bars, 10  $\mu\text{m}$ . \*,  $p <$   
22 0.05; \*\*,  $p <$  0.01.

23

24 **Figure 4. PLD2 is required for tension drop-induced membrane ruffling**  
25 **and macropinocytosis.** (A) PABD-GFP transfected control, PLD1- or PLD2-  
26 depleted myoblasts were subjected to hypertonic buffer treatment, and the  
27 distribution of PABD-GFP on dorsal membrane was captured by inverted  
28 fluorescence microscopy. (B) Macropinocytosis of PABD-GFP myoblasts upon  
29 hypertonic buffer treatment were monitored with Rh-Dextran internalization in  
30 cells PLD1 and PLD2 depleted cells compared to control. (C) The population of  
31 cells with more than three macropinosomes (the diameter  $\geq$  0.5  $\mu\text{m}$ ) as  
32 determined by Rh-Dextran for experimental conditions in (B) were quantified  
33 and compared with control cells. 120 cells of each condition were scored. (D)  
34 Western blotting of PLD1 and PLD2 in myoblast upon PLD shRNA KD. Scale  
35 bars, 10  $\mu\text{m}$ . \*\*,  $p <$  0.01.

36

37 **Figure 5. Lipid microdomain disruption upon tension drop.** (A) Effects of  
38 tension changes on lipid phase separation. GUVs with Topflour cholesterol

1 (green) and rhodamine-PE (magenta) to label L<sub>o</sub> and L<sub>d</sub> domains respectively  
2 were subjected to iso- (400 mM), hyper- (500 mM), or hypo-tonic (300 mM)  
3 glucose buffers and imaged with inverted epi-fluorescence microscopy. Scale  
4 bar, 10 μm. (B,C) Effects of hyper- or hypotonic buffer treatment on lipid rafts in  
5 cell. Myoblasts were treated with indicated buffers, fixed, stained with CTB and  
6 imaged with epi-fluorescence (GFP-PLD2) or STORM (CTB-AF 647) (B) or  
7 STED microscopy (C), respectively. (D) Boxed areas in (C) were magnified. (E-  
8 G) Fractionations of detergent-resistant membrane proteins upon tension  
9 changes. GFP-PLD2 expressing myoblasts treated with indicated osmotic  
10 buffers were harvested and lysed with buffer containing 1% Triton X-100 at 4 °C  
11 for 30 min and subjected to sucrose gradient ultracentrifugation. Detergent  
12 resistant membranes were distributed in fraction 2-4. (H) The ratio of GFP-  
13 PLD2 in each fraction was analyzed with Student *t*-test. Three repeats of the  
14 experiments were quantified and compared with isotonic buffer-treated cells. \*,  
15 *p* < 0.05.

16

17 **Figure 6. Acute tension drop induces macropinocytosis in myotubes.** (A)  
18 Macropinosome formation in myotubes. C2C12-derived myotubes incubated in  
19 indicated buffers plus Rh-Dextran. After intensive wash, cells were fixed,  
20 stained with DAPI and imaged with confocal microscopy. (B) Morphology of  
21 myotubes treated with isotonic buffer (Ba), hypotonic buffer (Bb) and followed  
22 by isotonic buffer recovery (Bc). Phase contrast microscopy images were  
23 captured with inverted fluorescence microscopy. Black arrow indicates the  
24 membrane bleb from cell swelling, and the red arrow heads point to  
25 macropinosomes induced by tension drop. (C) Macropinosomes are enriched  
26 with PA in OS-treated myotube. Live cell imaging of PABD-GFP expressing  
27 myotube was captured when cells were incubated in isotonic buffer (Ca),  
28 hypotonic buffer (Cb) and recovery isotonic buffer containing 1 μg/ml Rh-  
29 Dextran for 2 min with intensive wash (Cc). Insets are magnified images from  
30 the boxed areas. (D) Radial stretch induces macropinosome formation in  
31 myotubes. PABD-GFP expressing myotubes incubated in 1 μg/ml Rh-Dextran  
32 medium were subjected to 0% or 20% radial stretch for 2 min and followed by  
33 2 min resting (0% stretch). After intensive wash with PBS, myotubes were fixed  
34 and imaged with confocal microscopy. Scale bars, 10 μm.

35

36 **Figure 7. Both PLD1 and PLD2 contribute to the macropinosome**  
37 **formation in OS-treated myotubes.** (A) Kinetic distribution of PABD-GFP and  
38 Dyn2-mCherry in an OS-treated myotube. Boxed areas were magnified and



1 adjusted for lower green fluorescence intensity to better observe the  
2 macropinosome on top of a nucleus. (B, C) Distribution of PLD1 and PLD2 in  
3 OS-induced macropinosomes. C2C12-derived myotubes expressing GFP-  
4 PLD1, GFP-PLD2 and Dyn2-mCherry were treated with isotonic buffer or OS  
5 and followed by fixation and image acquisition with confocal microscopy. Single  
6 focal images were shown with scale bars of 10  $\mu\text{m}$ . (D) Effects of PLD inhibitors  
7 on OS-induced macropinosome formation. Myotubes were pre-treated with  
8 indicated inhibitors for 10 min followed by OS that also contained the indicated  
9 inhibitors. Phase contrast images of treated cells were acquired with inverted  
10 microscopy and the phenotypes were divided into three categories: crowded  
11 (macropinosome with diameter > 2  $\mu\text{m}$ ), intermediate and sparse as shown in  
12 graph. Data from three independent experiments with  $n > 100$  myotubes for  
13 each condition were compared to DMSO-treated control. #,  $p < 0.1$ ; \*,  $p < 0.05$ ;  
14 \*\*,  $p < 0.01$ .

15

16 **Figure 8. Model of tension drop-induced lipid raft disruption and**  
17 **macropinocytosis.** Under normal tension, lipid phase separation results in  
18 lipid-ordered domain formation thus segregates PLD2 from its activator  
19 PI(4,5)P<sub>2</sub> as well as its substrate PC (upper panel). When membrane tension  
20 is reduced suddenly, the decreased line tension would favor smaller lipid  
21 microdomains thus allow PLD2 to access its activator and substrate. The  
22 production of PA on plasma membrane leads to PI4P-5 kinase activation to  
23 generate PI(4,5)P<sub>2</sub> and promotes higher PLD activity, actin polymerization,  
24 Dyn2 activation and subsequently membrane ruffling and macropinocytosis.

25

26

27

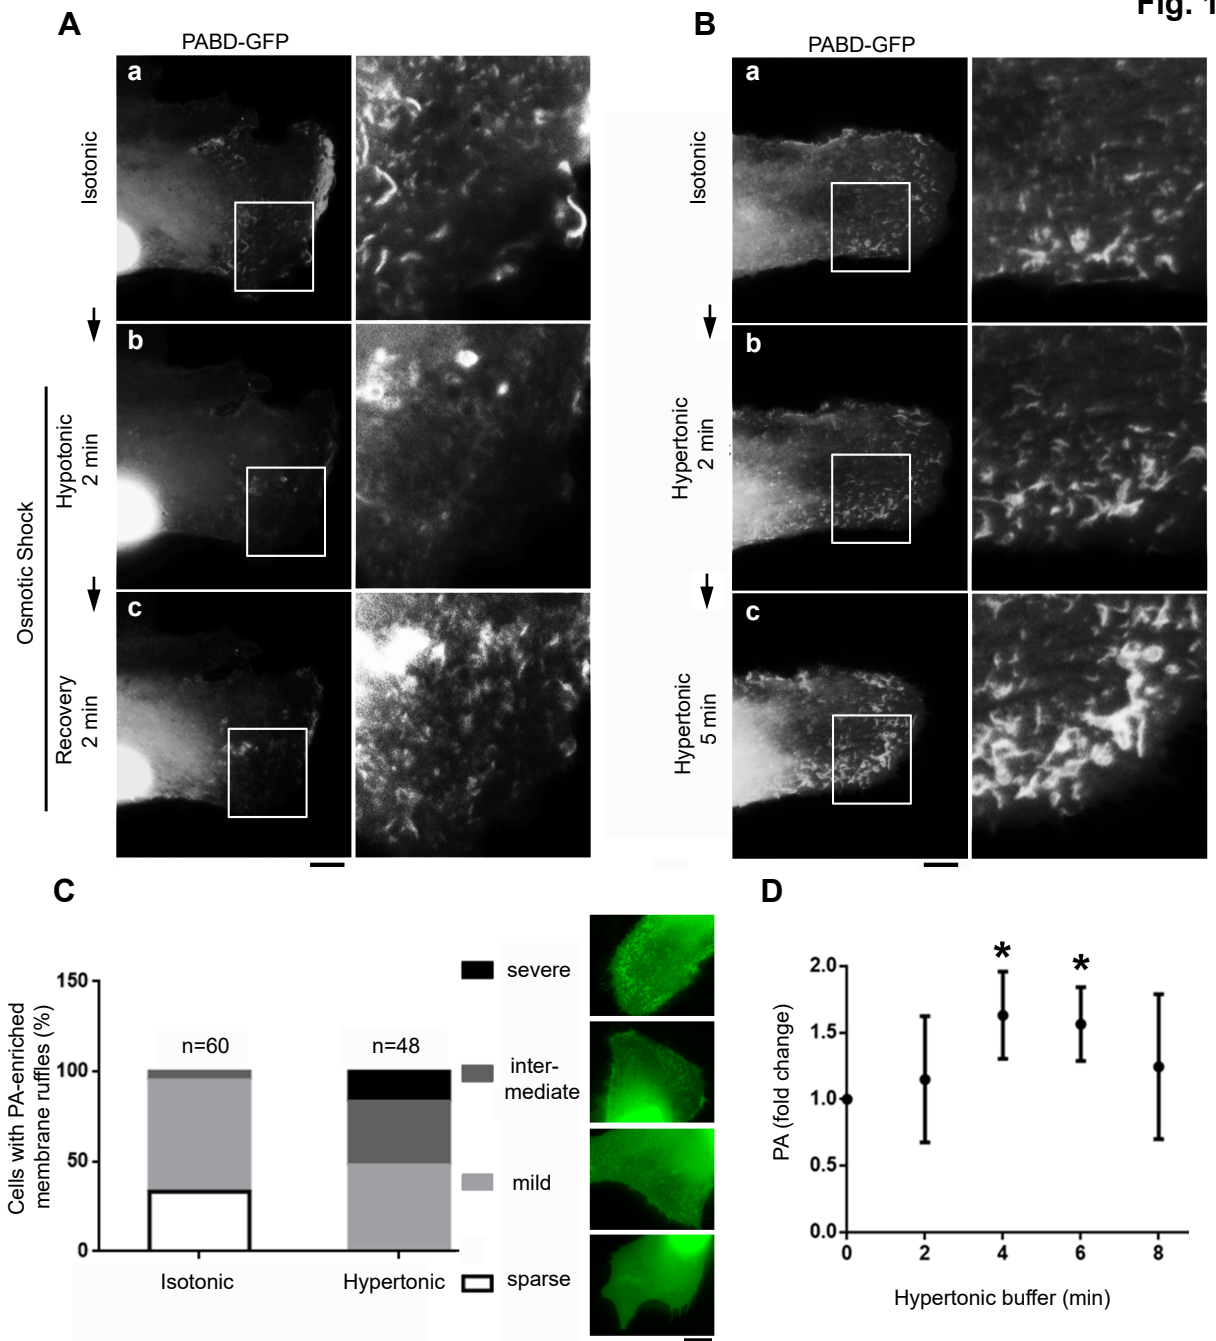

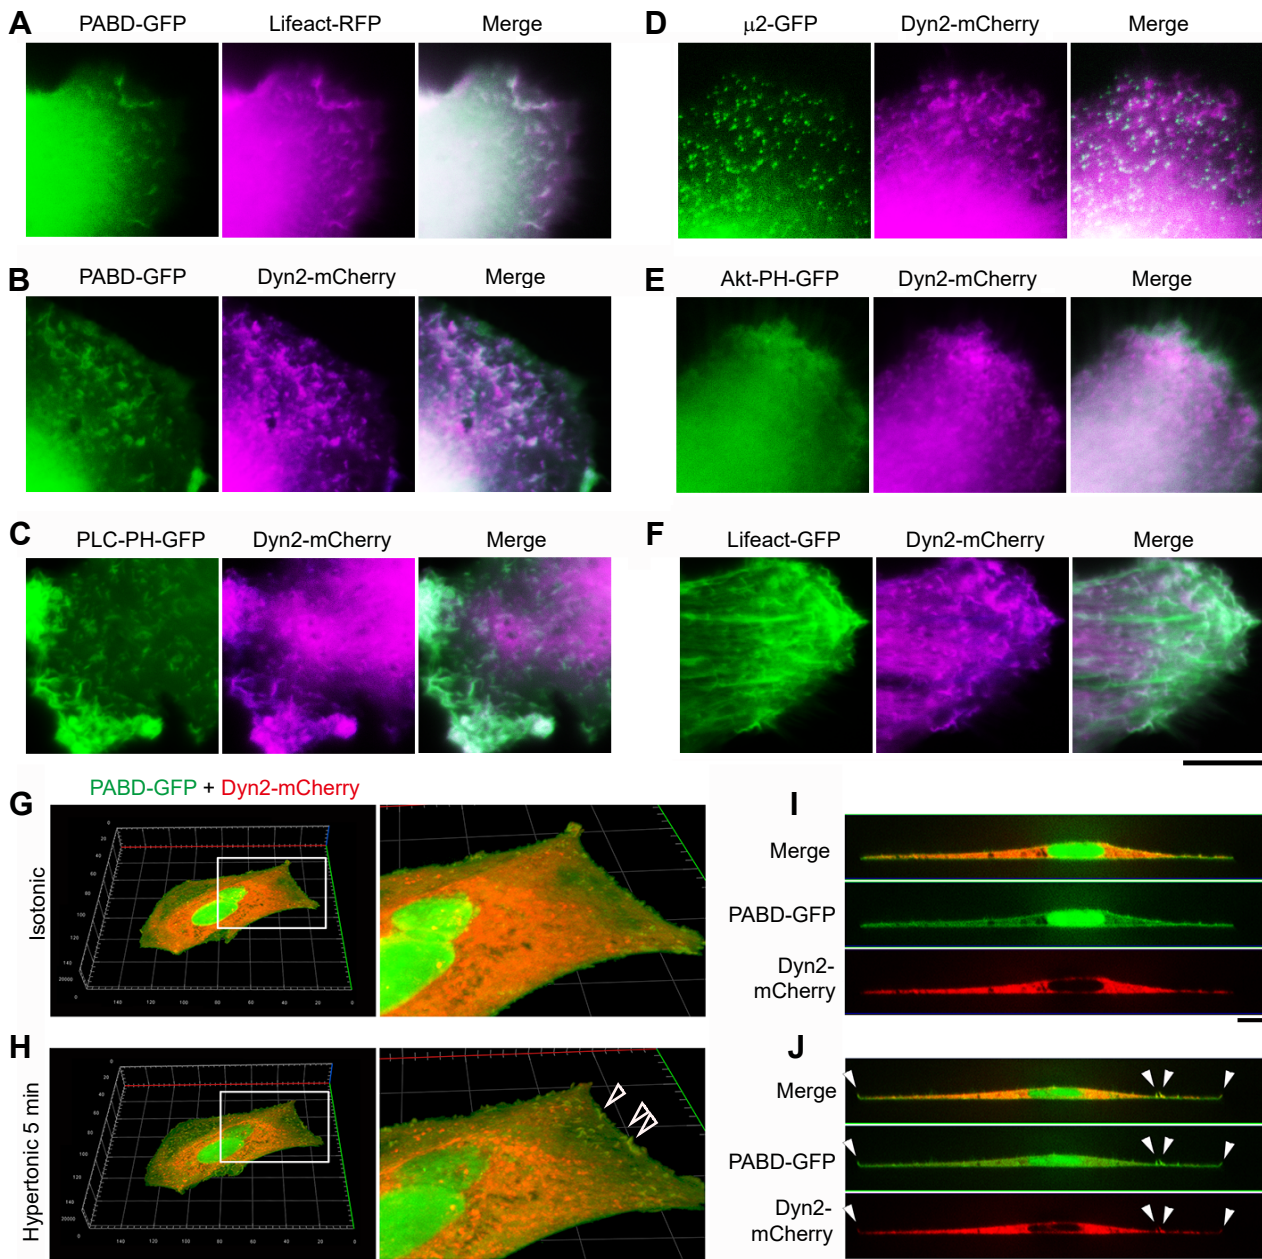

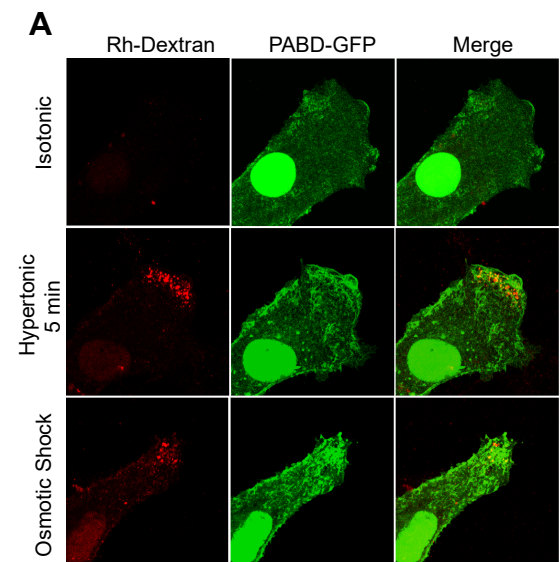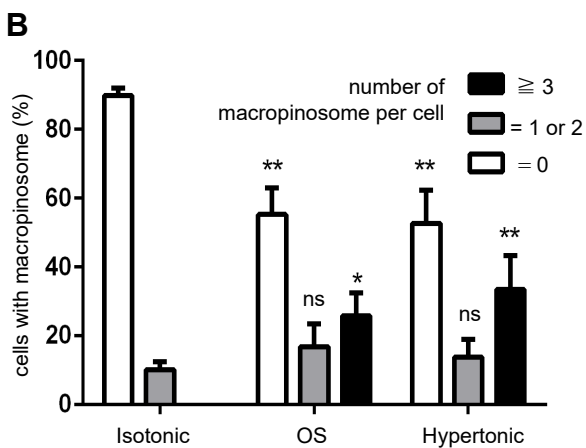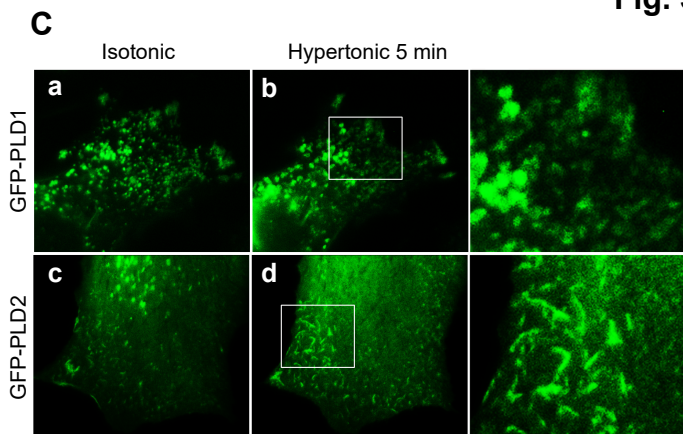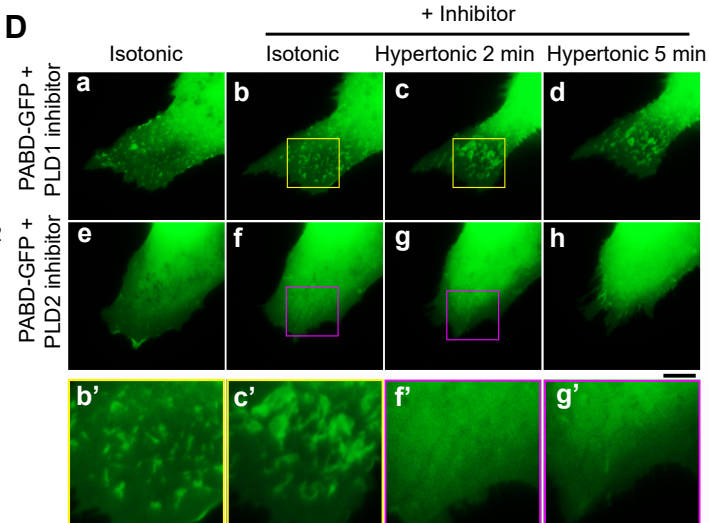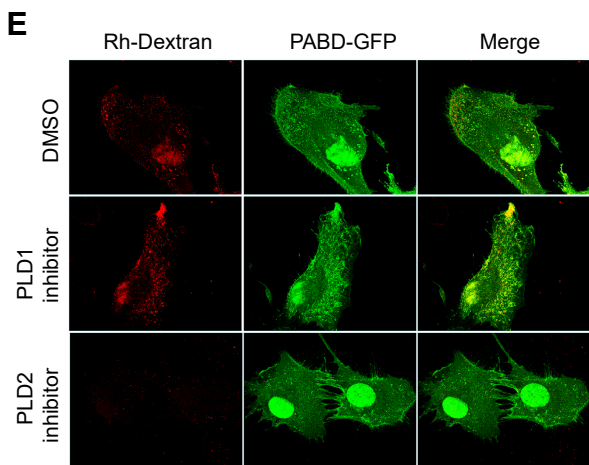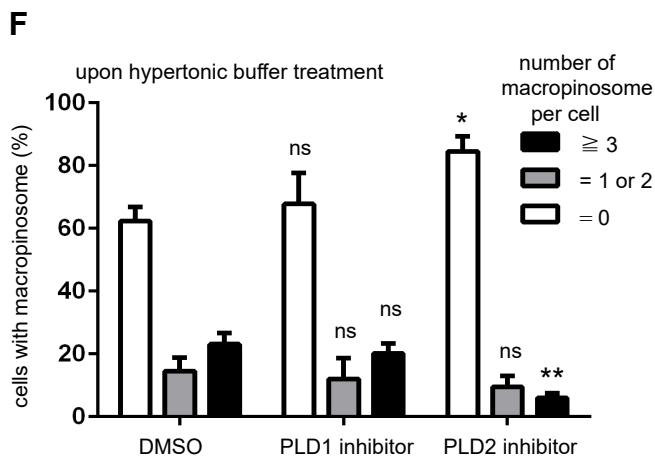

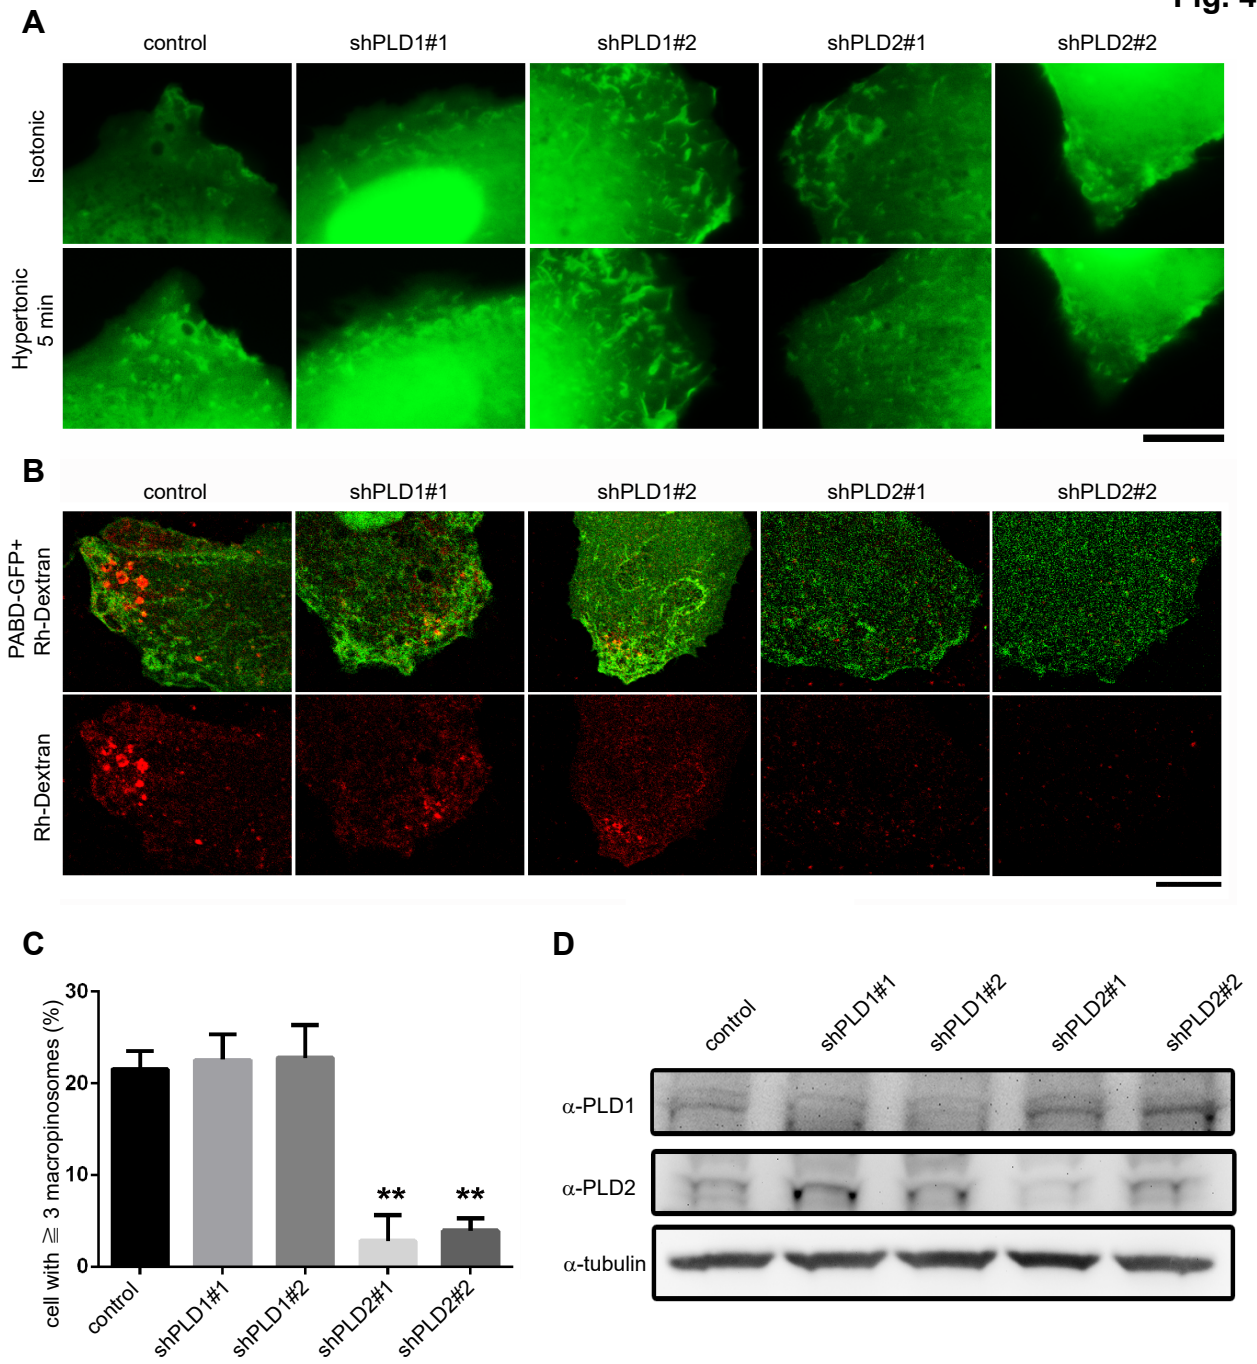

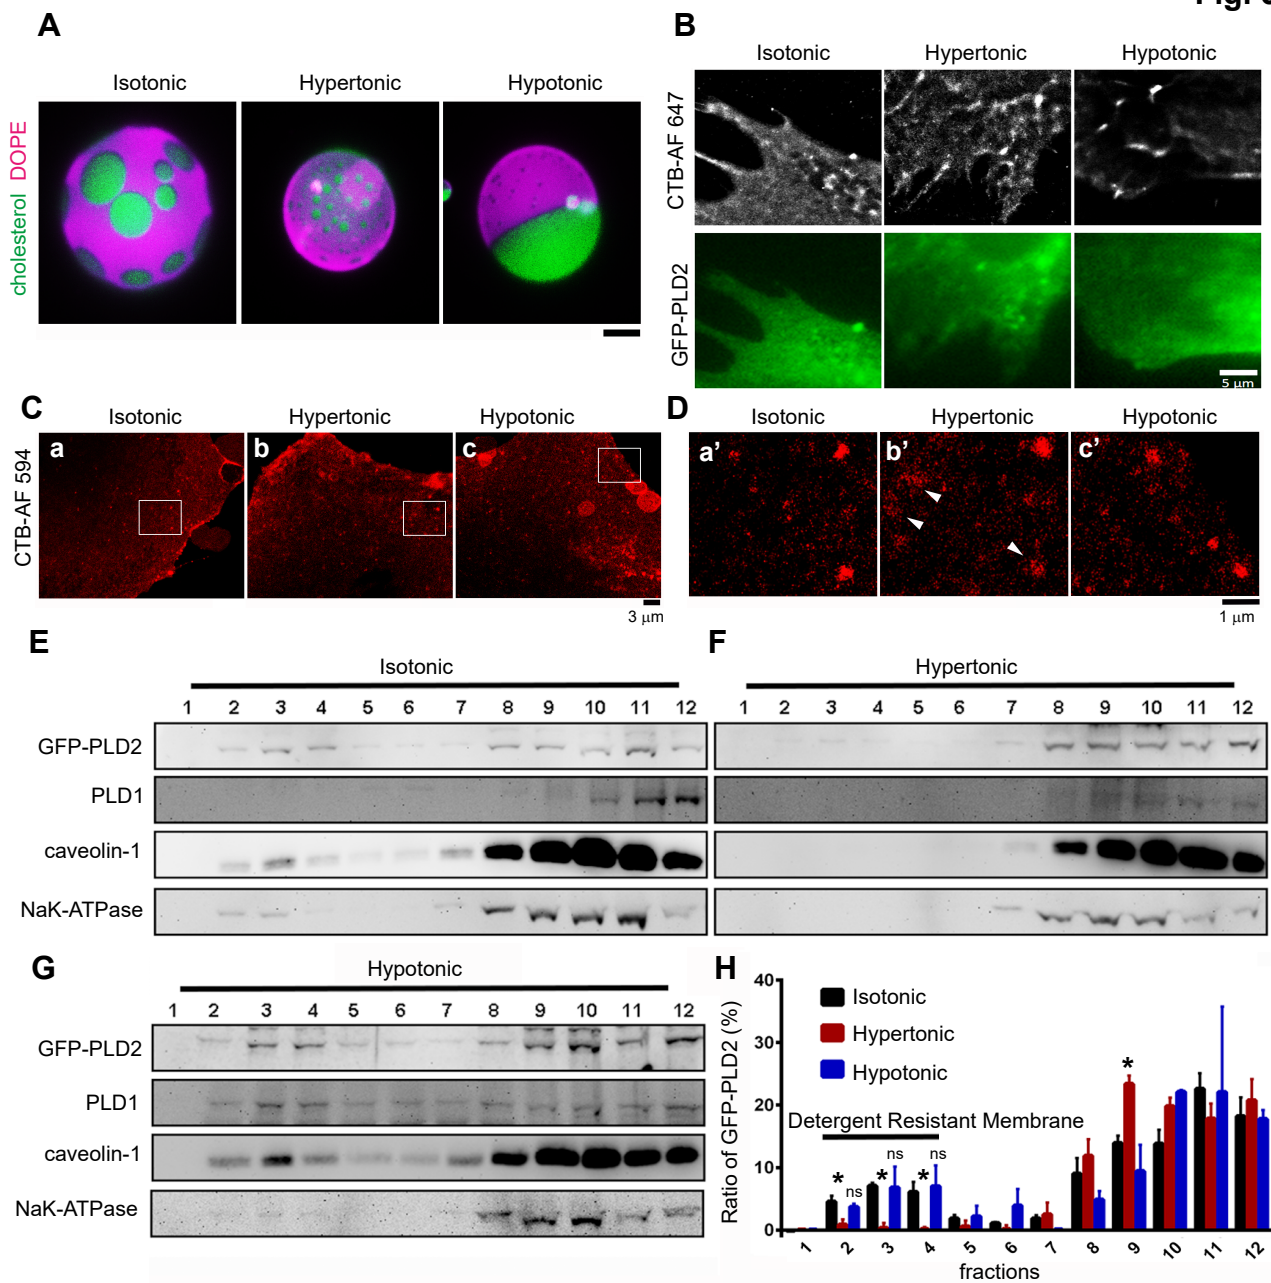

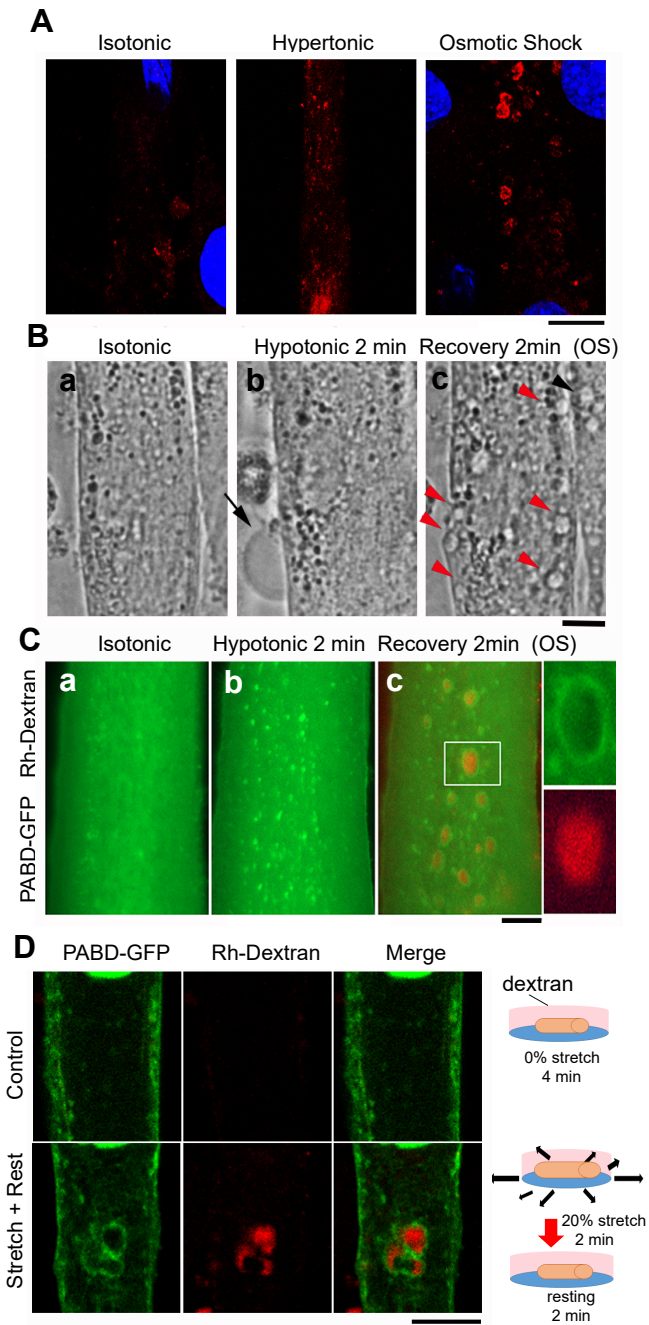

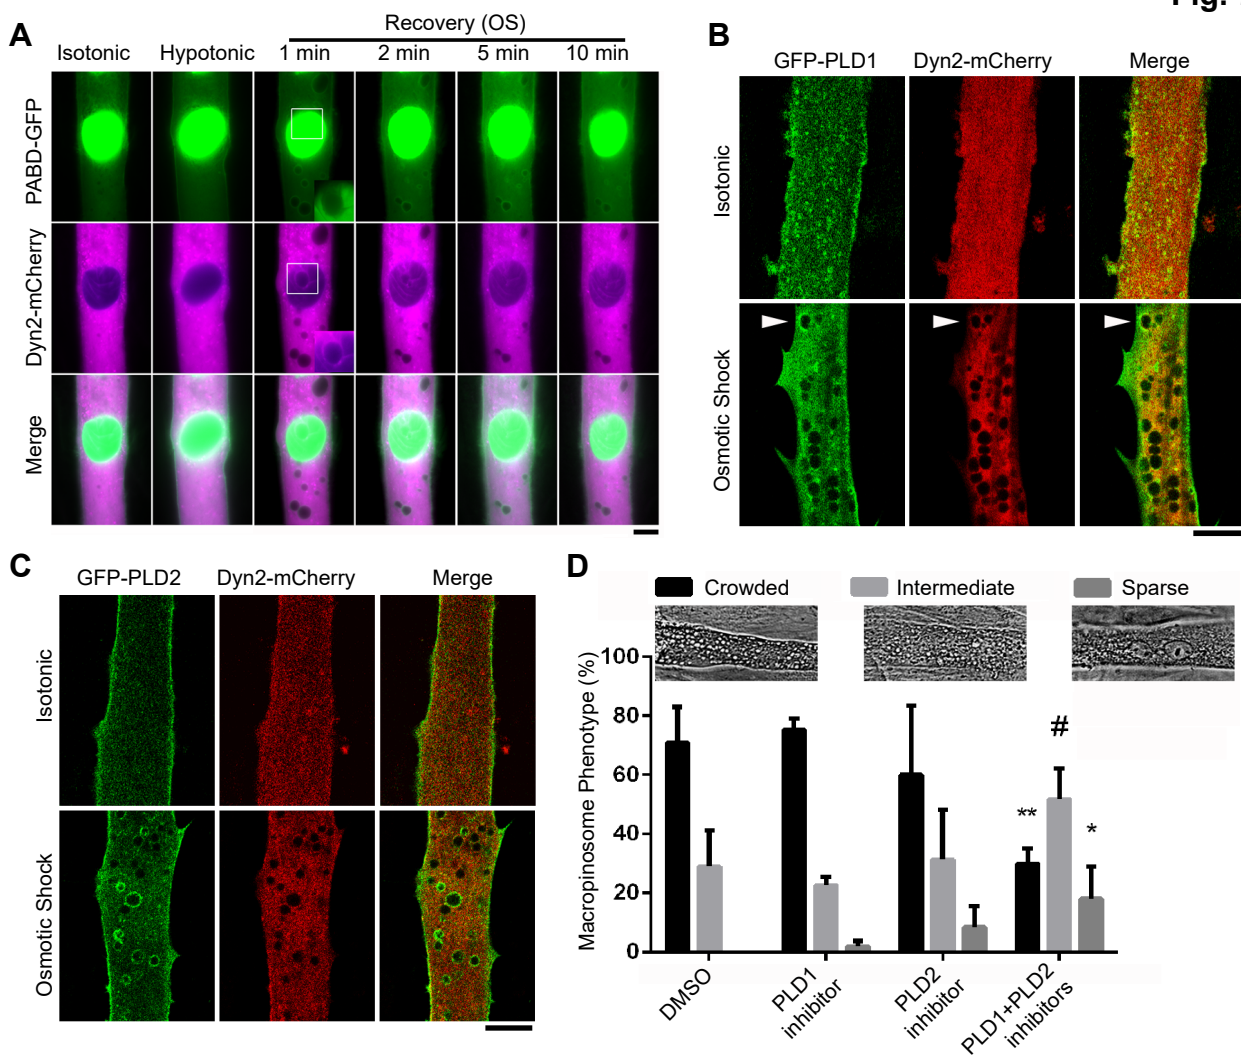



**Fig. 8**

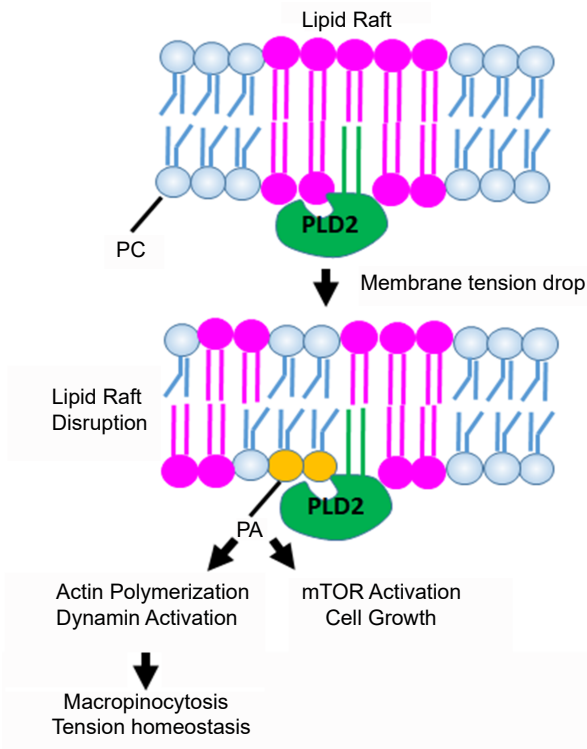

## **SUPPLEMENTARY INFORMATION**

### **Inventory of supplementary information (SI):**

- 1. Three supplementary figures (Fig S1 is related to Fig1, Fig S2 is related to Fig 3, Fig S3 is related to Fig 4, Fig S4 is not related to any figure);**
- 2. Three supplementary movies (these movies are related to Fig. 5).**

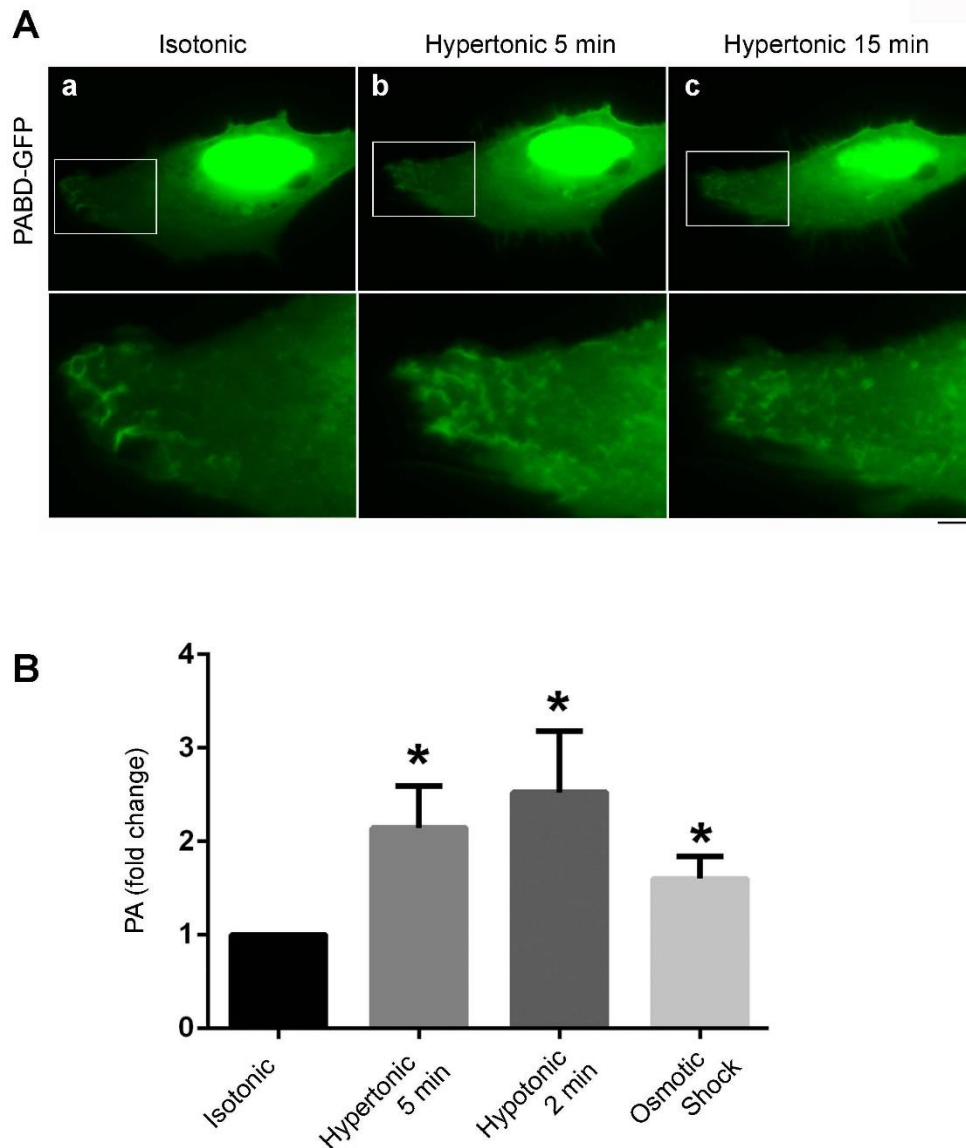

**Figure S1. PA distribution and quantification upon tension manipulation.**

(A) Distribution of PA was monitored with PABD-GFP in myoblast treated with hypertonic buffer for 5 or 15 min. (B) Effects of different osmotic buffers on cellular PA amount. Myoblasts treated with indicated buffers were harvested and extracted for total lipids. Total PA/protein ratio were compared with the isotonic buffer-treated cells. \*,  $p < 0.05$ . Scale bar, 10  $\mu\text{m}$ .

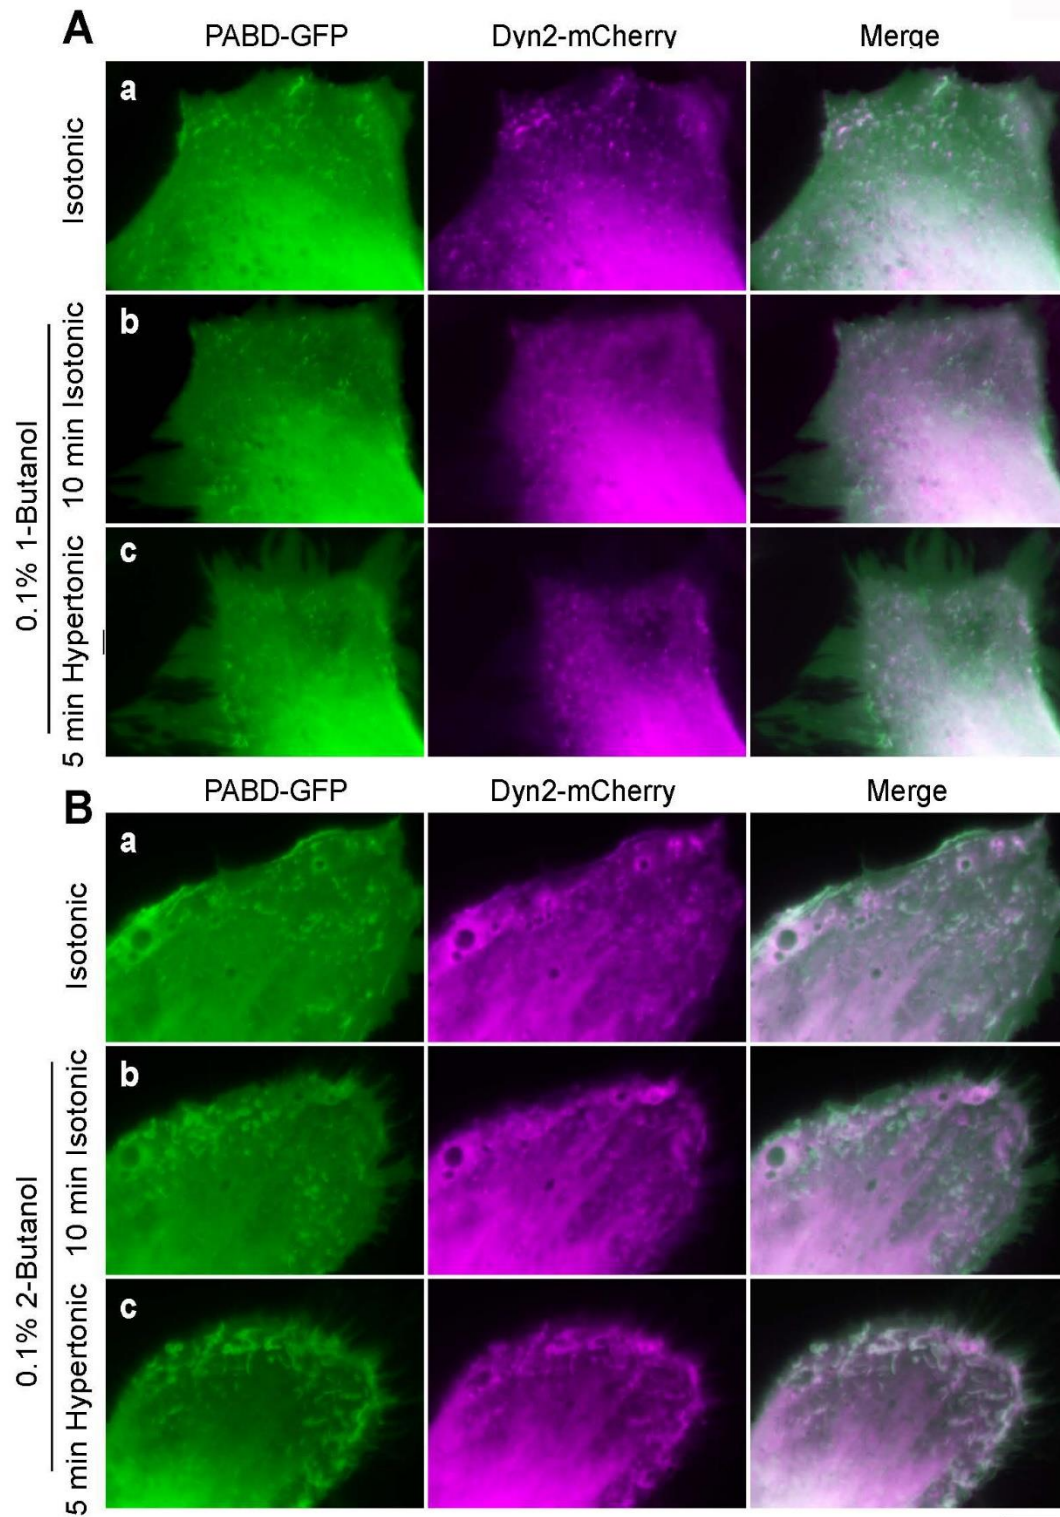

**Figure S2. Effects of butanol on tension-induced, PA-rich membrane ruffling.** PABD-GFP and Dyn2-mCherry transfected myoblasts were pretreated with 0.1% 1-butanol (A) or 2-butanol (B) in isotonic buffer for 10 min and subjected to hypertonic buffer incubation in the presence of indicated alcohol. Scale bar, 10  $\mu$ m.

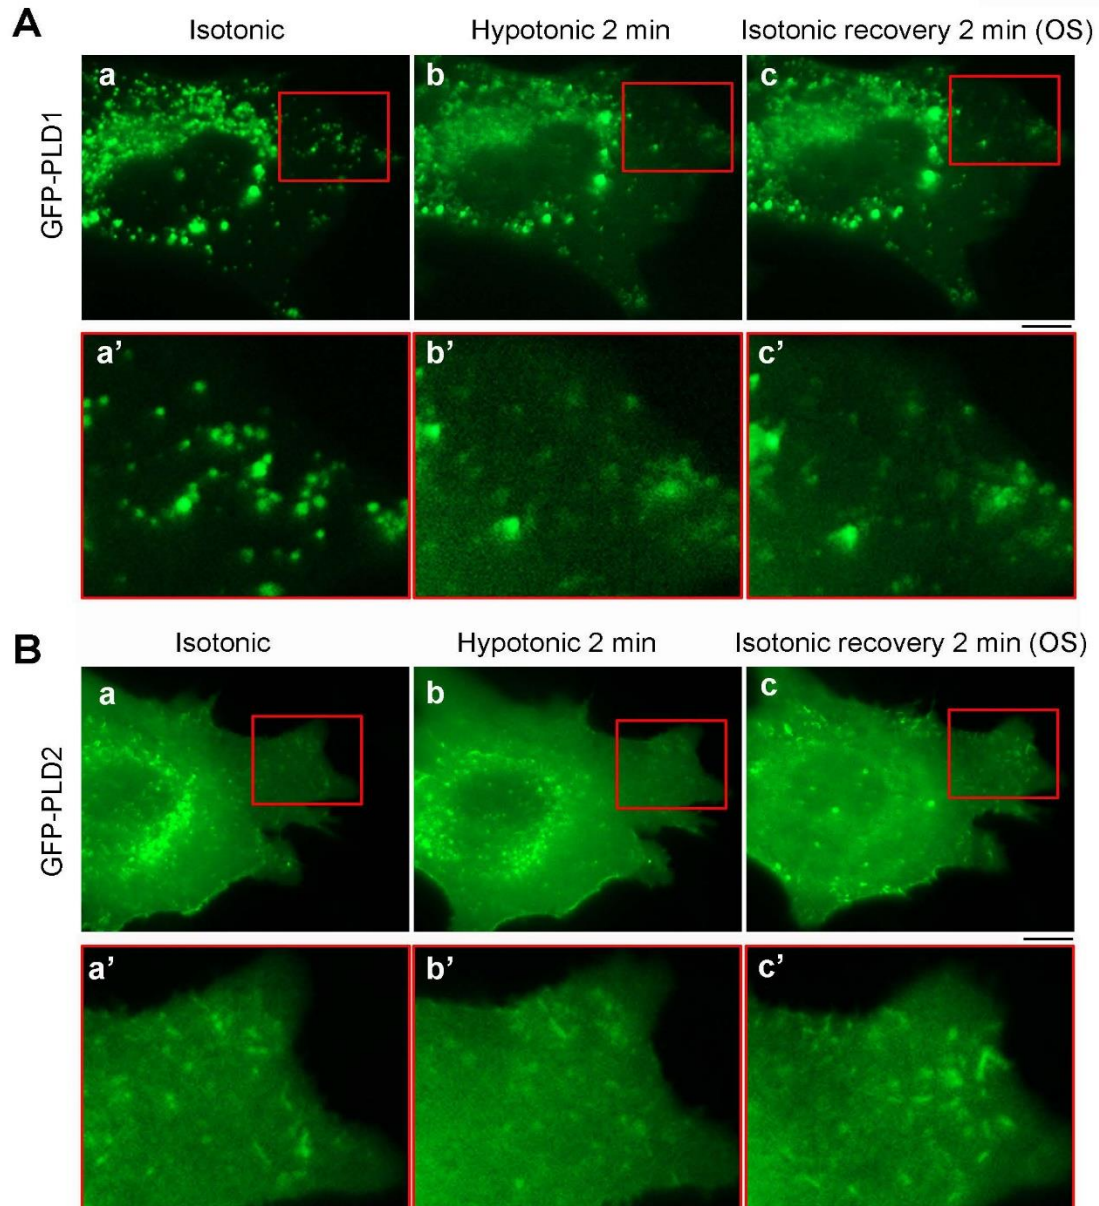

**Figure S3. Subcellular distribution of GFP-PLD1 or GFP-PLD2 upon OS treatment.** Myoblast expressing GFP-PLD1 or GFP-PLD2 were imaged in isotonic buffer (a), hypotonic buffer (b) and finally in isotonic recovery buffer (c) to monitor the kinetic distribution of these two PLDs. Magnified images of the boxed area are shown in the lower panel. Scale bar, 10  $\mu$ m.

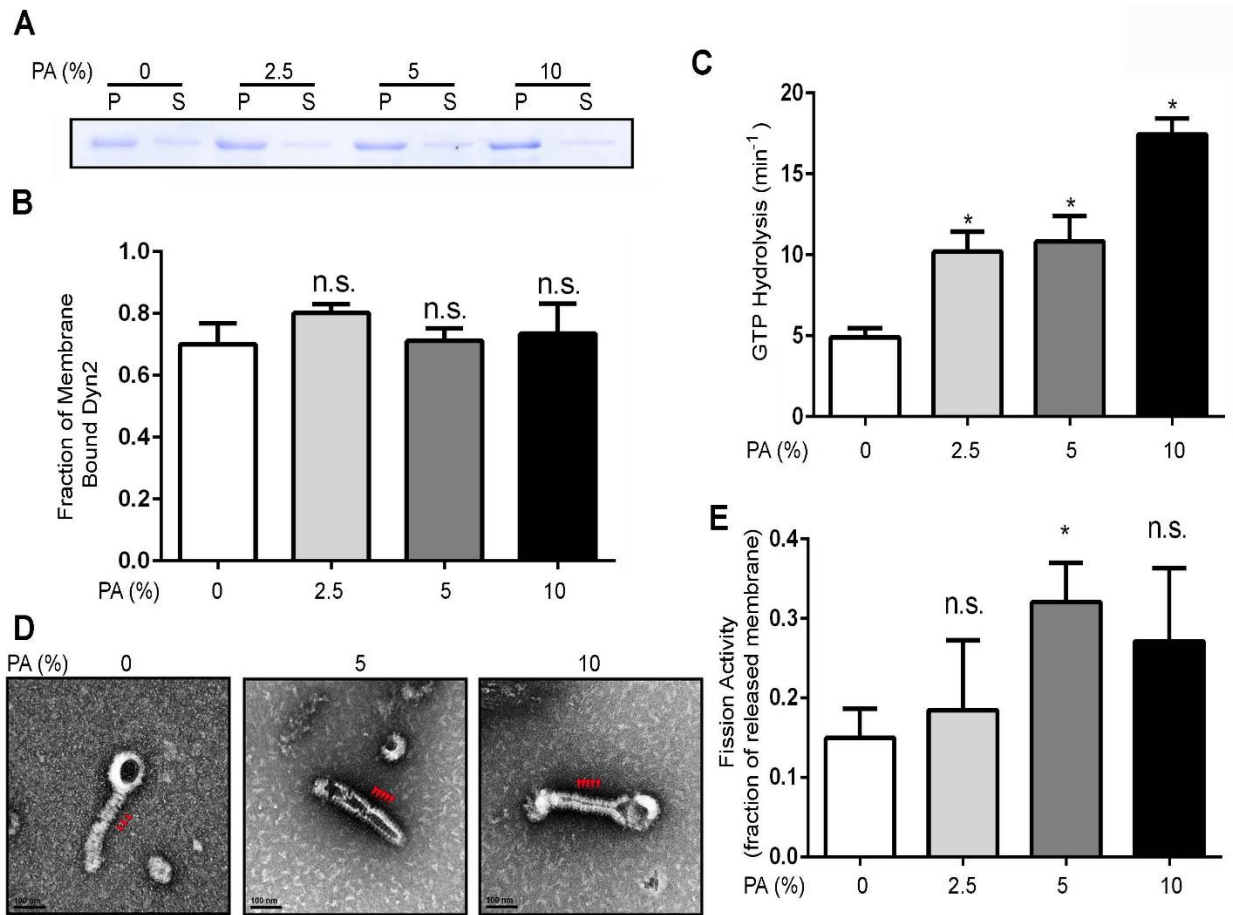

**Figure S4. Effects of PA-containing membrane on Dyn2 activity.** (A) Liposome binding assay. 0.5  $\mu$ M purified human Dyn2 was incubated with 150  $\mu$ M, 400 nm liposomes of indicated mole concentration of PA at 37°C for 15 min and sedimented into pellet (p) and supernatant (s) fractions by centrifugation. A representative Coomassie blue stained gel of p and s fractions of different percentage of PA-containing liposomes is shown. (B) The fraction of Dyn2 bound to liposomes were quantified with SDS-PAGE electrophoresis, Coomassie blue staining and ImageJ quantification. (C) Lipid-stimulated GTPase activity of Dyn2. 0.5  $\mu$ M Dyn2 was incubated with 400-nm liposomes containing different PA concentration in the presence of 1 mM GTP at 37 °C. Released Pi was determined using a colorimetric malachite green assay. (D) Electron micrographs of Dyn2 assembled onto 100-nm liposomes with varying concentrations of PA. Red arrowheads indicate Dyn2 spirals. (E) Membrane fission activity of Dyn2. 0.5  $\mu$ M Dyn2 was incubated with SUPER templates containing varying amounts of PA for 30 min in the presence of GTP. Membrane fission was measured by the release of fluorescently labeled vesicles into the supernatant after centrifugation of the SUPER templates. The data was normalized to its total lipids amount in the template. Data are shown as average

$\pm$  SD (n=3). \*,  $p < 0.05$ .
